# Supplementary material for: Single-cell transcriptomics of the Drosophila wing disc reveals instructive epithelium-to-myoblast interactions
Source: eLife. 2021 Mar 22;10:e61276. doi: 10.7554/eLife.61276 (PMC8021398; doi:10.7554/eLife.61276)
Supplement: Supplementary file 1. — Genes were selected based on being significantly and consistently upregulated or downregulated between the two time points in either the disc epithelium and/or the AMPs. The average gene expression within cells (natural-log scale), fraction of cells expressing a given gene, fold-change between time points (natural-log scale), and false discovery rate (FDR) for differential expression significance are reported. These gene expression, detection, and fold-change calculations are averaged across each of the pairwise comparisons performed, and the max FDR value is shown (see Materials and methods for details on differential expression between time points). Negative fold-change values indicate higher expression at 96 hr and are colored magenta. Positive fold-change values indicate higher expression at 120 hr and are colored green. N.R.: not replicable; calculations in which the fold-change direction differed between pairwise comparisons. [file elife-61276-supp1.xlsx]

## Sheet: Supplementary file 1
	Epithelium 96h	Epithelium 120h	AMP 96h	AMP 120h	Epithelium 96h	Epithelium 120h	AMP 96h	AMP 120h	Epithelium 96h-120h	Epithelium 96h-120h	AMP 96h-120h	AMP 96h-120h
	log avg exprs	log avg exprs	log avg exprs	log avg exprs	avg fraction exprs	avg fraction exprs	avg fraction exprs	avg fraction exprs	log avg FC	max FDR	log avg FC	max FDR
Aldh	0.607	0.035	1.393	0.124	0.586	0.034	0.952	0.14	-0.524	0	-1.222	0
CG10527	1.449	0.595	1.61	0.511	0.946	0.447	0.986	0.517	-0.84	0	-1.092	0
Chd64	1.786	1.233	1.586	0.517	0.988	0.854	0.979	0.553	-0.536	0	-1.045	0
Thor	0.217	0.133	1.172	0.188	0.339	0.078	0.862	0.19	-0.086	0	-0.975	0
CG44325	1.416	1.489	1.475	0.509	0.982	0.938	0.977	0.485	N.R.	N.R.	-0.942	0
Cpr49Ah	1.134	0.228	0.027	0.003	0.425	0.103	0.065	0.005	-0.922	0	-0.025	0
chinmo	1.074	0.137	1.582	0.711	0.879	0.144	0.999	0.671	-0.879	0	-0.884	0
GstD1	2.849	2.704	2.886	2.04	1	0.998	1	0.971	-0.134	0	-0.845	0
ab	1.36	0.811	1.04	0.241	0.975	0.571	0.956	0.275	-0.573	0	-0.814	0
CG1572	0.74	0.275	1.374	0.603	0.645	0.155	0.96	0.524	-0.479	0	-0.772	0
CG15093	1.365	0.693	1.241	0.479	0.977	0.52	0.979	0.505	-0.695	0	-0.769	0
fru	1.015	0.4	1.137	0.433	0.951	0.363	0.986	0.482	-0.625	0	-0.712	0
SPARC	0.98	0.403	3.389	2.699	0.954	0.395	1	1	-0.579	0	-0.71	0
Vajk2	1.004	0.286	0.032	0.007	0.208	0.077	0.078	0.01	-0.707	0	-0.027	0
LamC	0.6	0.137	0.875	0.166	0.653	0.102	0.886	0.186	-0.446	0	-0.704	0
mamo	0.316	0.543	1.155	0.481	0.268	0.19	0.977	0.568	0.247	0.517	-0.676	0
GstD3	1.002	0.629	0.952	0.321	0.865	0.515	0.864	0.358	-0.375	0	-0.634	0
Msp300	1.769	1.41	1.634	1.024	0.995	0.921	0.998	0.855	-0.378	0	-0.612	0
Vajk3	0.75	0.128	0.025	0.003	0.18	0.043	0.062	0.005	-0.597	0	-0.023	0
ps	1.11	0.798	1.082	0.51	0.967	0.717	0.983	0.578	-0.314	0	-0.583	0
CG1648	1.241	0.687	0.298	0.21	0.975	0.616	0.429	0.228	-0.527	0	N.R.	N.R.
mbl	1.164	1.22	0.877	0.358	0.968	0.901	0.944	0.469	N.R.	N.R.	-0.516	0
Clic	1.134	1.135	1.476	0.926	0.978	0.891	0.995	0.896	N.R.	N.R.	-0.511	0
CG14984	0.849	0.312	0.021	0.005	0.76	0.294	0.052	0.008	-0.503	0	-0.018	0
sty	0.334	0.327	0.938	0.453	0.516	0.321	0.88	0.491	N.R.	N.R.	-0.493	0
stg	1.274	1.117	1.727	1.253	0.891	0.581	0.981	0.802	N.R.	N.R.	-0.488	0
hdc	1.889	1.652	1.889	1.395	0.998	0.961	0.999	0.976	-0.251	0	-0.474	0
Jafrac1	2.373	1.928	1.897	1.681	1	0.98	1	0.991	-0.473	0	-0.23	0.001
zld	1.037	0.839	1.172	0.711	0.956	0.762	0.989	0.795	-0.22	0	-0.466	0
Tina-1	1.551	1.394	1.391	0.938	0.995	0.94	0.998	0.888	-0.156	0	-0.454	0
Atf3	0.32	0.078	0.675	0.25	0.534	0.079	0.858	0.333	-0.247	0	-0.428	0
SP1173	0.571	0.212	0.596	0.2	0.771	0.217	0.854	0.287	-0.345	0	-0.398	0
CG9008	0.951	0.539	0.099	0.18	0.541	0.349	0.216	0.262	-0.398	0	0.084	0
CG5151	0.782	0.792	0.649	0.231	0.869	0.65	0.817	0.324	N.R.	N.R.	-0.394	0
hoip	1.982	1.616	2.057	1.925	0.998	0.955	0.998	0.99	-0.391	0	N.R.	N.R.
CG10939	1.683	1.59	0.517	0.126	0.998	0.972	0.65	0.173	-0.075	0.028	-0.39	0
Imp	1.111	0.698	1.214	0.905	0.955	0.667	0.99	0.872	-0.386	0	-0.31	0
CG15083	1.269	1.064	1.163	0.789	0.98	0.85	0.954	0.739	-0.165	0	-0.378	0
CG32425	0.462	0.349	0.916	0.546	0.709	0.396	0.949	0.679	-0.111	0	-0.369	0
CG9338	0.14	0.028	0.426	0.071	0.169	0.025	0.553	0.092	-0.12	0	-0.357	0
Idgf4	0.935	0.629	0.047	0.02	0.782	0.322	0.098	0.032	-0.346	0	-0.029	0
CG1943	2.169	1.842	1.909	1.91	0.999	0.964	0.998	0.994	-0.344	0	N.R.	N.R.
jim	1.687	1.678	1.828	1.5	0.999	0.971	1	0.983	N.R.	N.R.	-0.333	0
Nrg	0.968	0.919	0.817	0.485	0.95	0.811	0.926	0.63	N.R.	N.R.	-0.329	0
sqd	2.529	2.208	2.545	2.357	1	0.996	1	1	-0.324	0	-0.18	0
CG2865	0.573	0.437	0.707	0.387	0.748	0.416	0.86	0.505	-0.156	0	-0.322	0
Cam	2.662	2.361	2.351	2.147	1	0.997	1	1	-0.318	0	-0.216	0
rgn	0.889	0.533	1.005	0.767	0.866	0.457	0.956	0.755	-0.317	0	-0.24	0
wdp	0.247	0.151	0.698	0.379	0.477	0.173	0.864	0.508	-0.102	0	-0.314	0
Col4a1	0.112	0.03	1.058	0.739	0.221	0.037	0.963	0.655	-0.078	0	-0.312	0
pyd	0.77	0.704	0.73	0.416	0.866	0.667	0.843	0.453	N.R.	N.R.	-0.311	0
REG	1.579	1.285	1.631	1.413	0.996	0.924	0.999	0.98	-0.309	0	-0.225	0
bnb	1.449	1.166	0.082	0.029	0.768	0.507	0.193	0.047	-0.308	0	-0.056	0
Nop60B	1.739	1.433	1.888	1.807	0.999	0.936	1	0.995	-0.307	0	-0.077	0
Cyt-c-p	1.426	1.122	1.46	1.339	0.989	0.851	0.992	0.946	-0.303	0	-0.133	0
dally	0.739	0.85	0.65	0.351	0.857	0.756	0.835	0.452	0.124	0.239	-0.3	0
Osi14	0.387	0.075	0.009	0.001	0.156	0.034	0.021	0.001	-0.299	0	-0.009	0
Trx-2	2.013	1.787	1.686	1.394	0.999	0.987	0.999	0.98	-0.239	0	-0.298	0
CNBP	3.519	3.232	3.347	3.287	1	1	1	1	-0.297	0	-0.066	0
dpy	0.602	0.316	0.12	0.026	0.797	0.334	0.277	0.044	-0.295	0	-0.097	0
CG6767	1.689	1.395	1.396	1.395	0.995	0.899	0.989	0.967	-0.294	0	N.R.	N.R.
CG9782	0.962	0.667	0.028	0.014	0.859	0.535	0.07	0.023	-0.293	0	-0.016	0
baf	1.701	1.442	1.646	1.363	0.997	0.933	0.999	0.977	-0.278	0	-0.292	0
Tsp42El	0.071	0.018	0.416	0.125	0.135	0.015	0.624	0.189	-0.053	0	-0.29	0
CG8547	0.559	0.334	0.641	0.347	0.769	0.352	0.856	0.478	-0.212	0	-0.29	0
Gasp	0.963	0.701	0.027	0.015	0.47	0.184	0.066	0.02	-0.28	0	-0.013	0
GILT3	0.032	0.008	0.43	0.15	0.058	0.01	0.548	0.191	-0.021	0	-0.28	0
Mgstl	1.185	0.999	0.945	0.669	0.975	0.832	0.957	0.752	-0.201	0	-0.279	0
CG12643	0.735	0.656	0.433	0.156	0.785	0.525	0.576	0.159	N.R.	N.R.	-0.276	0
Ten-a	1.555	1.741	1.294	1.014	0.99	0.966	0.989	0.736	0.173	0.005	-0.273	0
Moe	1.768	1.675	1.809	1.539	0.999	0.981	1	0.988	N.R.	N.R.	-0.27	0
CG42342	0.625	0.712	0.588	0.323	0.528	0.443	0.626	0.329	N.R.	N.R.	-0.268	0
RpL34a	2.587	2.339	2.649	2.531	1	0.999	1	1	-0.263	0	-0.129	0
CG9336	0.311	0.045	0.027	0.01	0.212	0.017	0.054	0.014	-0.262	0	-0.017	0
His3.3A	2.381	2.109	2.105	2.012	1	0.995	1	0.999	-0.254	0	-0.096	0.011
HP4	1.189	0.946	1.268	1.14	0.982	0.801	0.991	0.947	-0.251	0	-0.135	0
Arc1	0.126	0.028	0.535	0.271	0.181	0.032	0.596	0.329	-0.106	0	-0.251	0
COX4	1.924	1.691	1.9	1.771	1	0.983	1	0.997	-0.25	0	-0.14	0
CG4038	1.608	1.361	1.703	1.687	0.997	0.926	0.999	0.995	-0.25	0	-0.017	0.006
BthD	0.532	0.283	0.461	0.316	0.668	0.266	0.678	0.404	-0.249	0	-0.153	0
Adk2	1.48	1.226	1.497	1.262	0.997	0.923	1	0.972	-0.248	0	-0.242	0
CG30159	0.846	0.584	0.668	0.63	0.902	0.592	0.903	0.788	-0.245	0	N.R.	N.R.
CG17765	1.317	1.084	1.415	1.249	0.993	0.889	0.999	0.978	-0.243	0	-0.17	0
CG3902	0.704	0.771	0.36	0.123	0.824	0.686	0.597	0.184	N.R.	N.R.	-0.241	0
Flo1	0.645	0.4	0.835	0.677	0.841	0.431	0.947	0.797	-0.24	0	-0.155	0
Pax	0.347	0.317	0.708	0.471	0.585	0.352	0.895	0.605	N.R.	N.R.	-0.24	0
Mpcp2	1.392	1.206	1.421	1.177	0.993	0.907	0.998	0.969	-0.196	0	-0.239	0
Pdp1	0.353	0.147	0.502	0.266	0.552	0.158	0.75	0.373	-0.208	0	-0.239	0
CG15784	0.333	0.105	0.086	0.009	0.357	0.093	0.118	0.012	-0.239	0	-0.076	0
yellow-c	0.288	0.049	0.009	0.003	0.445	0.051	0.023	0.005	-0.236	0	-0.007	0
Cbs	0.725	0.567	0.62	0.392	0.859	0.577	0.864	0.523	-0.147	0	-0.234	0
CG1354	1.292	1.072	1.302	1.11	0.991	0.875	0.997	0.96	-0.231	0	-0.192	0
Idgf6	0.268	0.032	0.134	0.007	0.208	0.03	0.156	0.01	-0.227	0	-0.129	0
CCT2	1.409	1.181	1.453	1.324	0.994	0.906	0.999	0.977	-0.226	0	-0.122	0
dj-1beta	1.593	1.383	1.477	1.34	0.999	0.943	0.999	0.982	-0.222	0	-0.145	0
vkg	0.056	0.022	0.536	0.318	0.119	0.026	0.79	0.393	-0.033	0	-0.221	0
cher	0.272	0.112	0.279	0.062	0.442	0.138	0.524	0.102	-0.147	0	-0.22	0
Tspo	1.008	0.82	1.046	0.835	0.945	0.742	0.966	0.852	-0.19	0	-0.216	0
Jheh2	0.658	0.631	0.394	0.184	0.809	0.613	0.636	0.263	N.R.	N.R.	-0.214	0
RpA-70	0.707	0.501	0.684	0.547	0.844	0.499	0.875	0.684	-0.214	0	-0.134	0
REPTOR	0.211	0.106	0.287	0.076	0.423	0.128	0.533	0.121	-0.107	0	-0.211	0
eIF2alpha	1.473	1.27	1.54	1.427	0.996	0.92	1	0.985	-0.208	0	-0.118	0
CG31673	0.406	0.2	0.297	0.159	0.633	0.225	0.538	0.229	-0.206	0	-0.141	0
Nmdmc	0.642	0.426	0.55	0.47	0.812	0.458	0.798	0.611	-0.202	0	-0.081	0
CG13631	0.142	0.023	0.236	0.034	0.238	0.024	0.383	0.051	-0.119	0	-0.201	0
CG34325	0.078	0.018	0.218	0.029	0.158	0.019	0.399	0.045	-0.059	0	-0.19	0
Desat1	0.993	0.8	0.801	0.638	0.957	0.738	0.944	0.77	-0.188	0	-0.163	0
CG6084	1.261	1.074	0.725	0.704	0.983	0.848	0.903	0.795	-0.184	0	-0.021	0.002
LanA	0.274	0.177	0.582	0.402	0.518	0.224	0.838	0.558	-0.098	0	-0.178	0
CG9312	0.004	0.174	0	0.003	0.009	0.104	0	0.005	0.171	0	0.003	0.001
KdelR	1.246	1.42	1.24	1.206	0.986	0.964	0.994	0.973	0.179	0	N.R.	N.R.
Gnpnat	0.712	0.891	0.21	0.251	0.875	0.772	0.455	0.404	0.18	0	0.042	0.391
CG4612	0.622	0.796	0.492	0.608	0.822	0.756	0.792	0.767	0.18	0	0.117	0
Agpat3	0.579	0.766	0.566	0.688	0.826	0.752	0.859	0.827	0.185	0	0.125	0
CG13053	0	0.188	0	0.004	0.002	0.027	0	0.004	0.185	0	0.003	0.011
jtb	0.024	0.02	0.397	0.583	0.052	0.023	0.623	0.658	N.R.	N.R.	0.19	0
CG10005	0.507	0.693	0.018	0.018	0.706	0.656	0.043	0.031	0.193	0	N.R.	N.R.
Spn88Ea	0.671	0.868	0.346	0.323	0.849	0.791	0.607	0.45	0.195	0	N.R.	N.R.
Pde9	0.14	0.355	0.023	0.065	0.256	0.336	0.049	0.094	0.205	0.031	0.043	0
CG1161	0.755	0.956	0.618	0.725	0.909	0.842	0.883	0.838	0.206	0	0.107	0
CG12213	0.268	0.474	0.217	0.274	0.51	0.523	0.466	0.426	0.212	0	0.06	0.054
CG14439	0.075	0.278	0.001	0.004	0.171	0.301	0.004	0.008	0.212	0	0.003	0.241
bai	1.215	1.417	1.116	1.146	0.991	0.96	0.99	0.972	0.213	0	N.R.	N.R.
Tapdelta	1.897	2.103	1.765	1.781	1	0.997	1	0.999	0.216	0	N.R.	N.R.
miple2	1.458	1.672	1.919	2.135	0.992	0.978	1	1	0.212	0	0.217	0
hh	0.298	0.514	0.005	0.006	0.328	0.323	0.013	0.009	0.221	0.019	N.R.	N.R.
lbk	0.27	0.478	0.172	0.247	0.429	0.438	0.377	0.371	0.222	0	0.074	0
Ugt302K1	0.093	0.31	0.001	0.004	0.189	0.296	0.004	0.007	0.224	0	0.002	0.846
grh	1.292	1.527	0.031	0.032	0.987	0.967	0.075	0.051	0.226	0	N.R.	N.R.
CG2493	0.988	1.214	0.699	0.769	0.964	0.925	0.904	0.85	0.226	0	0.072	0.263
Mkp3	0.674	0.895	0.781	0.968	0.822	0.764	0.908	0.89	0.227	0	0.19	0
modSP	0.334	0.55	0.018	0.028	0.572	0.583	0.042	0.046	0.228	0	0.011	0.992
CG11882	0.628	0.849	0.393	0.515	0.834	0.772	0.697	0.684	0.229	0	0.124	0
CG15212	0.007	0.245	0	0.003	0.013	0.103	0	0.006	0.232	0	0.003	0.002
kune	1.167	1.383	0.176	0.261	0.982	0.958	0.382	0.403	0.233	0	0.087	0
Wnt2	0.06	0.279	0.003	0.008	0.072	0.21	0.007	0.014	0.234	0	0.005	0.424
Had1	0.049	0.287	0.002	0.006	0.105	0.276	0.005	0.011	0.237	0	0.004	0.564
CG33303	1.288	1.514	1.05	1.138	0.989	0.978	0.989	0.971	0.238	0	0.093	0
Spase25	1.268	1.5	0.981	1.071	0.992	0.966	0.979	0.957	0.239	0	0.089	0
CG10359	0.346	0.597	0.038	0.011	0.477	0.521	0.074	0.019	0.241	0.012	-0.027	0
Cln7	0.151	0.382	0.058	0.139	0.316	0.436	0.135	0.215	0.242	0	0.087	0.001
CG33169	0.217	0.442	0.036	0.053	0.361	0.442	0.082	0.084	0.243	0	N.R.	N.R.
Catsup	0.775	1.026	0.59	0.742	0.912	0.871	0.862	0.847	0.25	0	0.155	0
CG43759	0.589	0.819	0.367	0.309	0.784	0.738	0.648	0.433	0.25	0	-0.058	0
mth	0.243	0.491	0.136	0.23	0.467	0.523	0.299	0.356	0.252	0	0.1	0.008
CG13064	0.012	0.247	0	0.002	0.028	0.167	0	0.004	0.253	0	0.002	0.002
RpL38	3.995	4.168	4.102	4.365	1	1	1	1	0.177	0	0.256	0
CG5390	1.191	1.459	0.226	0.234	0.973	0.951	0.398	0.318	0.259	0	N.R.	N.R.
Mnn1	0.242	0.494	0.097	0.121	0.453	0.533	0.223	0.196	0.26	0	0.023	0.734
CG11069	0.385	0.628	0.01	0.012	0.643	0.652	0.026	0.02	0.261	0	N.R.	N.R.
CG9427	0.73	1	0.026	0.028	0.792	0.726	0.066	0.046	0.266	0	N.R.	N.R.
Manf	1.113	1.362	0.901	0.911	0.976	0.949	0.964	0.917	0.267	0	N.R.	N.R.
mnd	0.415	0.584	0.435	0.696	0.614	0.581	0.705	0.778	0.177	0	0.267	0
CG32276	1.701	1.949	1.405	1.438	0.999	0.996	0.998	0.989	0.267	0	N.R.	N.R.
side	0.004	0.01	0.023	0.282	0.007	0.008	0.042	0.309	N.R.	N.R.	0.272	0
cdi	0.489	0.725	0.383	0.655	0.709	0.67	0.661	0.745	0.252	0.002	0.273	0
Tpi	1.336	1.482	1.012	1.281	0.963	0.944	0.948	0.963	0.141	0.014	0.28	0
CG11438	0.25	0.528	0.007	0.01	0.466	0.548	0.018	0.016	0.281	0	N.R.	N.R.
CG4928	0.039	0.302	0.002	0.003	0.094	0.274	0.004	0.005	0.281	0	N.R.	N.R.
GstO3	1.221	1.507	0.052	0.064	0.954	0.944	0.119	0.1	0.282	0	N.R.	N.R.
E2f1	0.673	0.96	0.642	0.596	0.842	0.797	0.86	0.72	0.283	0	N.R.	N.R.
CG15168	0.687	0.937	0.453	0.694	0.852	0.821	0.738	0.802	0.285	0	0.241	0
Ost48	1.387	1.654	1.073	1.204	0.994	0.986	0.986	0.978	0.286	0	0.136	0.001
shf	0.658	0.93	0.02	0.024	0.625	0.602	0.05	0.039	0.289	0	N.R.	N.R.
Gyg	0.51	0.494	0.178	0.453	0.649	0.475	0.299	0.502	N.R.	N.R.	0.291	0
luna	0.42	0.7	0.802	1.06	0.584	0.611	0.932	0.93	0.292	0	0.258	0
Mtpalpha	0.829	0.963	0.849	1.132	0.915	0.831	0.949	0.96	0.157	0.1	0.292	0
CaBP1	1.297	1.581	1.096	1.183	0.992	0.977	0.987	0.972	0.294	0	N.R.	N.R.
CG17032	1.027	1.348	0.655	0.394	0.943	0.898	0.648	0.401	0.294	0	-0.263	0
Kal1	0.393	0.56	0.662	0.933	0.441	0.367	0.742	0.798	0.173	0.04	0.295	0
MSBP	0.695	0.976	0.602	0.759	0.874	0.845	0.869	0.857	0.298	0	0.165	0
CG8031	0.363	0.63	0.333	0.627	0.618	0.649	0.626	0.769	0.271	0	0.3	0
MFS14	0.144	0.448	0.1	0.149	0.288	0.418	0.206	0.227	0.302	0	0.052	0.383
Stt3B	0.843	1.122	0.677	0.849	0.926	0.894	0.904	0.893	0.304	0	0.183	0.014
Lamp1	0.91	1.205	0.918	1.076	0.953	0.928	0.972	0.958	0.305	0	0.171	0
CG42239	1.049	1.251	0.918	1.219	0.969	0.933	0.969	0.972	0.246	0	0.306	0
mdy	0.276	0.316	0.115	0.406	0.502	0.347	0.26	0.557	0.044	0.005	0.306	0
HSPC300	0.458	0.732	0.422	0.712	0.694	0.728	0.729	0.827	0.311	0	0.292	0
Fkbp14	0.381	0.693	0.702	0.618	0.616	0.66	0.885	0.742	0.313	0	N.R.	N.R.
Cht2	0.769	1.014	0.356	0.651	0.903	0.856	0.539	0.654	0.256	0	0.314	0
Spp	0.735	1.026	0.593	0.669	0.898	0.86	0.858	0.807	0.316	0	N.R.	N.R.
cindr	0.591	0.889	0.364	0.49	0.812	0.798	0.668	0.666	0.318	0	0.125	0
ergic53	0.748	1.048	0.567	0.679	0.895	0.867	0.849	0.808	0.318	0	0.115	0
Spn77Ba	0.43	0.744	0.014	0.015	0.659	0.678	0.035	0.025	0.324	0	N.R.	N.R.
Spase12	1.104	1.411	0.922	1.085	0.978	0.956	0.969	0.952	0.325	0	0.164	0
CrebA	0.552	0.87	0.445	0.395	0.76	0.772	0.68	0.546	0.327	0	N.R.	N.R.
mRpL33	0.658	0.885	0.668	0.997	0.85	0.807	0.893	0.934	0.25	0	0.327	0
CG17754	0.185	0.493	0.193	0.296	0.377	0.522	0.39	0.427	0.328	0	0.114	0.021
Hr78	0.48	0.782	0.277	0.382	0.735	0.749	0.558	0.559	0.329	0	0.113	0.427
Sf3b5	0.778	1.073	0.633	0.917	0.9	0.87	0.871	0.9	0.329	0	0.278	0
CG15529	0.029	0.035	0.402	0.72	0.063	0.042	0.524	0.626	0.006	0.542	0.329	0
mav	0.334	0.651	0.025	0.074	0.571	0.653	0.059	0.111	0.329	0	0.051	0
CBP	0.475	0.789	0.762	1.031	0.685	0.727	0.896	0.925	0.329	0	0.282	0
fbp	0.494	0.579	0.851	1.171	0.685	0.557	0.93	0.946	0.088	0.413	0.33	0
Pvf3	0.045	0.088	0.1	0.413	0.062	0.063	0.159	0.364	0.051	0.335	0.331	0
CG13023	0.009	0.35	0	0.005	0.008	0.038	0.001	0.006	0.332	0	0.005	0.246
CG11486	0.586	0.899	0.512	0.721	0.81	0.795	0.798	0.822	0.335	0	0.218	0
lncRNA:CR31044	0.659	0.973	0.525	0.708	0.811	0.798	0.789	0.794	0.335	0	0.18	0
Fas3	2.152	2.451	0.106	0.102	0.999	0.999	0.237	0.155	0.337	0	N.R.	N.R.
Inx3	1.987	2.338	0.641	0.875	0.999	0.999	0.809	0.868	0.338	0	0.249	0
CG5885	1.55	1.863	1.253	1.393	0.998	0.99	0.994	0.987	0.338	0	0.138	0
ana	0.015	0.357	0.001	0.01	0.023	0.098	0.003	0.015	0.338	0	0.008	0.087
sbb	1.4	1.742	1.185	1.504	0.994	0.979	0.992	0.99	0.345	0	0.322	0
Ostgamma	0.965	1.295	0.763	0.881	0.962	0.932	0.932	0.904	0.347	0	0.12	0
CG32982	0.659	0.959	0.996	0.875	0.817	0.827	0.922	0.721	0.351	0	N.R.	N.R.
Gapdh1	1.707	1.574	1.259	1.606	0.994	0.949	0.974	0.982	-0.139	0	0.354	0
OstDelta	1.151	1.474	0.889	1.013	0.982	0.97	0.968	0.939	0.354	0	N.R.	N.R.
Inx2	1.578	1.914	0.773	0.878	0.996	0.994	0.927	0.881	0.357	0	N.R.	N.R.
CG33774	0.52	0.865	0.465	0.724	0.768	0.788	0.768	0.833	0.359	0	0.253	0
TRAM	1.022	1.354	0.553	0.694	0.967	0.939	0.838	0.818	0.36	0	0.142	0
pdgy	0.202	0.537	0.251	0.598	0.362	0.525	0.463	0.714	0.347	0	0.361	0
pcs	0.497	0.79	0.256	0.467	0.673	0.739	0.503	0.642	0.362	0	0.21	0
Jupiter	1.446	1.653	1.506	1.855	0.995	0.98	0.998	0.998	0.241	0	0.364	0
Sec23	0.579	0.906	0.418	0.579	0.816	0.807	0.73	0.739	0.366	0	0.17	0
CG6770	1.809	2.186	1.637	1.914	0.989	0.98	0.989	0.991	0.367	0	0.301	0
Sb	0.173	0.521	0.003	0.007	0.285	0.373	0.007	0.011	0.367	0.011	0.004	0.165
Calr	2.464	2.81	2.126	2.324	1	1	1	1	0.368	0	0.204	0
smal	0.083	0.266	0.149	0.495	0.146	0.237	0.259	0.488	0.193	0.306	0.369	0
CG9416	0.047	0.374	0.278	0.568	0.11	0.398	0.53	0.677	0.37	0	0.317	0
rst	0.162	0.369	0.242	0.593	0.279	0.298	0.427	0.675	0.214	0.475	0.372	0
UQCR-11	1.996	2.271	1.888	2.249	1	0.999	1	1	0.348	0	0.372	0
CG4455	1.047	1.366	0.448	0.704	0.968	0.95	0.761	0.819	0.374	0	0.268	0
emc	1.603	1.941	1.456	1.502	0.976	0.938	0.987	0.962	0.377	0	N.R.	N.R.
cv-c	0.433	0.394	0.69	1.065	0.57	0.322	0.854	0.901	-0.044	0	0.379	0
hid	0.249	0.614	0.048	0.178	0.436	0.573	0.099	0.23	0.383	0	0.14	0
Cpr78E	0.002	0.367	0	0.006	0.006	0.145	0	0.01	0.383	0	0.006	0
CG9691	0.821	1.164	0.02	0.027	0.847	0.795	0.05	0.045	0.384	0	N.R.	N.R.
Nep2	0.125	0.484	0.004	0.008	0.226	0.423	0.011	0.014	0.384	0	0.004	0.47
mt:ND3	0.611	0.917	0.635	0.982	0.777	0.805	0.812	0.921	0.308	0.773	0.39	0
Sans	0.284	0.661	0.191	0.147	0.508	0.656	0.388	0.226	0.391	0	-0.046	0
vvl	1.724	2.127	0.04	0.057	0.744	0.707	0.096	0.085	0.393	0.023	N.R.	N.R.
Rtnl1	1.719	2.08	0.829	0.897	0.999	0.998	0.943	0.906	0.395	0	N.R.	N.R.
Fim	0.422	0.571	0.711	1.079	0.67	0.59	0.872	0.937	0.167	0.151	0.397	0
lft	0.66	1.045	0.013	0.02	0.852	0.87	0.033	0.034	0.397	0	N.R.	N.R.
beat-IIb	0.001	0.01	0.033	0.413	0.006	0.014	0.054	0.362	0.009	0.695	0.398	0
CG13364	1.663	1.871	1.583	1.954	0.998	0.99	0.998	0.998	0.296	0	0.398	0
klu	0.623	1.025	0.023	0.186	0.687	0.685	0.052	0.243	0.402	0	0.172	0
Ppn	0.119	0.209	0.425	0.808	0.249	0.25	0.679	0.801	0.102	0.8	0.408	0
nkd	0.925	1.295	1.073	1.208	0.831	0.797	0.887	0.781	0.409	0	0.136	0.947
CG31075	0.438	0.852	0.041	0.106	0.557	0.67	0.086	0.141	0.41	0	0.066	0.147
CG11905	0.131	0.515	0.003	0.007	0.228	0.436	0.007	0.012	0.41	0	0.004	0.495
dnt	0.194	0.297	0.192	0.585	0.36	0.328	0.394	0.693	0.113	0.062	0.411	0
CG17271	0.76	1.147	0.385	0.48	0.907	0.904	0.707	0.671	0.413	0	0.098	0.524
mirr	0.716	1.101	0.012	0.017	0.387	0.418	0.029	0.028	0.416	0.02	N.R.	N.R.
CG8860	1.893	2.242	1.593	1.877	1	0.998	0.999	0.999	0.417	0	0.297	0
Lac	1.055	1.454	0.162	0.154	0.964	0.964	0.302	0.21	0.426	0	N.R.	N.R.
GNBP3	0.595	1.019	0.014	0.021	0.743	0.817	0.037	0.034	0.432	0	N.R.	N.R.
lncRNA:CR44811	0.246	0.674	0.006	0.014	0.348	0.467	0.017	0.024	0.434	0	0.007	0.725
glec	0.345	0.748	0.424	0.405	0.533	0.617	0.649	0.5	0.434	0	N.R.	N.R.
CG12880	0.274	0.691	0.157	0.531	0.386	0.499	0.328	0.614	0.435	0	0.398	0
pum	1.279	1.703	1.12	1.293	0.991	0.983	0.99	0.987	0.437	0	0.18	0
fax	2.588	2.798	2.659	3.103	1	1	1	1	0.186	0	0.443	0
alt	0.664	1.064	0.565	0.744	0.859	0.849	0.835	0.832	0.445	0	0.195	0
CG33977	0.586	0.98	0.452	0.654	0.797	0.841	0.754	0.789	0.448	0	0.21	0
CG17672	0.251	0.679	0.012	0.019	0.437	0.634	0.032	0.033	0.448	0	0.006	0.235
CG32447	0.132	0.549	0.006	0.012	0.222	0.429	0.016	0.022	0.449	0	0.006	0.588
Tom	0.907	1.362	0.03	0.059	0.887	0.899	0.075	0.089	0.452	0	0.028	0.803
NijA	0.342	0.775	0.006	0.014	0.49	0.702	0.016	0.024	0.453	0	0.007	0.872
Acbp1	0.748	1.1	0.897	1.346	0.861	0.852	0.956	0.979	0.376	0	0.454	0
Oscillin	0.357	0.821	0.189	0.431	0.594	0.767	0.397	0.603	0.455	0	0.246	0
robo2	0.746	1.185	0.261	0.476	0.7	0.668	0.501	0.575	0.463	0	0.221	0
drl	0.475	0.672	0.309	0.745	0.478	0.428	0.531	0.637	0.203	0.578	0.465	0
kud	1.046	1.458	0.854	1.207	0.968	0.96	0.957	0.968	0.467	0	0.36	0
CG14257	0.038	0.503	0.001	0.006	0.083	0.393	0.002	0.011	0.468	0	0.006	0
CG33978	0.587	1.032	0.015	0.019	0.784	0.827	0.037	0.033	0.47	0	0.004	0.754
CG3655	0.604	0.74	0.601	1.047	0.805	0.709	0.835	0.919	0.174	0.349	0.473	0
CG4586	0.03	0.469	0.04	0.472	0.074	0.479	0.085	0.552	0.473	0	0.456	0
CG9689	0.678	1.125	0.017	0.025	0.789	0.792	0.042	0.042	0.474	0	N.R.	N.R.
CG31121	0.49	0.933	0.008	0.013	0.714	0.82	0.02	0.02	0.477	0	N.R.	N.R.
magu	0.417	0.876	0.065	0.1	0.272	0.322	0.117	0.129	0.481	0.001	0.035	0.442
CG11686	0.328	0.795	0.174	0.341	0.557	0.728	0.324	0.481	0.484	0	0.181	0
Act5C	4.029	3.969	4.016	4.484	1	1	1	1	N.R.	N.R.	0.487	0
CG7637	0.925	1.272	0.975	1.461	0.929	0.916	0.961	0.981	0.382	0	0.489	0
Syp	2.416	2.802	2.094	2.553	1	1	1	1	0.398	0	0.491	0
Eip78C	0.031	0.526	0.04	0.427	0.073	0.512	0.091	0.547	0.5	0	0.397	0
Diap1	0.871	1.345	0.605	0.879	0.899	0.915	0.83	0.847	0.5	0	0.308	0.03
CG3823	0.014	0.477	0	0.006	0.038	0.458	0.001	0.011	0.506	0	0.006	0
Tom7	1.377	1.715	1.432	1.92	0.989	0.977	0.996	0.998	0.4	0	0.507	0
SP1029	0.05	0.506	0.016	0.01	0.082	0.253	0.034	0.019	0.507	0	N.R.	N.R.
Eip75B	0.379	0.738	0.319	0.806	0.593	0.688	0.538	0.804	0.389	0	0.516	0
neo	0.151	0.622	0.005	0.011	0.303	0.576	0.013	0.02	0.517	0	0.006	0.472
Sod3	0.895	1.417	0.025	0.036	0.764	0.819	0.062	0.059	0.521	0	N.R.	N.R.
salm	0.702	1.158	0.012	0.045	0.613	0.623	0.029	0.034	0.524	0	0.035	0.453
lncRNA:CR43432	0.056	0.56	0.002	0.026	0.122	0.4	0.004	0.043	0.525	0	0.026	0
CG4914	0.252	0.759	0.018	0.014	0.312	0.499	0.044	0.025	0.526	0	-0.004	0.105
CG5758	0.026	0.518	0.001	0.013	0.04	0.325	0.002	0.02	0.532	0	0.013	0
bib	0.122	0.199	0.34	0.845	0.242	0.234	0.618	0.827	0.092	0.532	0.536	0
Msr-110	0.996	1.488	0.06	0.058	0.878	0.82	0.147	0.098	0.549	0	N.R.	N.R.
cib	2.465	2.615	2.518	3.048	1	1	1	1	0.178	0.373	0.554	0
br	0.983	1.467	0.977	1.492	0.941	0.949	0.957	0.987	0.502	0	0.555	0
nmo	1.164	1.681	0.542	1.084	0.962	0.972	0.826	0.914	0.529	0	0.564	0
stai	1.406	1.978	1.385	1.677	0.933	0.977	0.968	0.983	0.567	0	0.303	0
l(3)neo38	1.288	1.502	0.552	1.089	0.987	0.963	0.765	0.943	0.216	0	0.57	0
Hsc70-3	1.532	2.032	1.352	1.738	0.995	0.99	0.996	0.994	0.575	0	0.412	0
Pdi	1.707	2.267	1.456	1.749	0.999	0.999	0.999	0.998	0.579	0	0.303	0
kek1	1.092	1.678	0.706	0.521	0.763	0.815	0.842	0.539	0.592	0	-0.19	0
CG4374	0.102	0.673	0.002	0.004	0.162	0.464	0.004	0.007	0.596	0	0.002	0.928
St2	0.011	0.582	0	0.01	0.029	0.427	0.001	0.018	0.601	0	0.01	0
Hsp23	3.377	3.979	3.418	3.502	0.999	1	1	1	0.603	0	N.R.	N.R.
betaTub60D	0.323	0.846	0.891	1.461	0.514	0.697	0.935	0.965	0.557	0	0.614	0
bip1	0.273	0.89	0.116	0.361	0.497	0.749	0.249	0.464	0.624	0	0.255	0
CG31997	1.673	2.276	0.059	0.099	0.93	0.944	0.139	0.152	0.637	0	N.R.	N.R.
Hsp67Ba	0.532	1.131	0.135	0.446	0.537	0.795	0.23	0.5	0.639	0	0.336	0
GV1	0.181	0.821	0.004	0.015	0.231	0.569	0.01	0.025	0.662	0	0.011	0.312
CG7675	0.686	1.318	0.018	0.036	0.678	0.775	0.045	0.06	0.677	0	0.016	0.682
CG41128	1.376	1.826	1.106	1.753	0.991	0.988	0.98	0.998	0.598	0	0.693	0
Spn100A	0.008	0.644	0	0.012	0.019	0.37	0	0.022	0.694	0	0.012	0
CG15282	0.141	0.844	0.002	0.015	0.178	0.319	0.005	0.024	0.704	0	0.012	0.006
tna	1.196	1.653	1.109	1.766	0.955	0.96	0.954	0.993	0.448	0	0.71	0
CG2852	3.056	3.779	2.881	3.143	1	1	1	1	0.735	0	0.264	0
Act57B	0.004	0.029	0.088	0.817	0.011	0.035	0.1	0.402	0.027	0.88	0.782	0
ogre	1.445	2.148	0.932	1.272	0.993	0.993	0.929	0.948	0.789	0	N.R.	N.R.
sn	0.704	0.879	0.756	1.493	0.852	0.755	0.904	0.959	0.207	0.64	0.793	0
Fas2	0.987	1.171	1.408	2.208	0.944	0.893	0.996	0.996	0.226	0.008	0.805	0
Hsp27	2.893	3.664	2.578	3.216	1	1	1	1	0.844	0	0.688	0
Cat	0.737	1.544	0.603	0.832	0.88	0.93	0.858	0.879	0.871	0	0.24	0
CG15905	0.103	0.964	0.002	0.017	0.186	0.583	0.005	0.029	0.881	0	0.015	0
CG11835	0.006	0.046	0.12	0.992	0.019	0.056	0.136	0.632	0.039	0.003	0.917	0
pio	1.151	1.999	0.045	0.067	0.975	0.988	0.109	0.111	0.92	0	N.R.	N.R.
eEF1alpha2	0.005	0.042	0.06	0.94	0.015	0.054	0.107	0.596	0.04	0.162	0.925	0
CG9628	0.364	1.306	0.008	0.03	0.432	0.857	0.02	0.05	0.969	0	0.021	0
mub	0.485	0.628	0.343	1.278	0.733	0.622	0.644	0.844	N.R.	N.R.	0.998	0
wbl	0.257	1.245	0.004	0.027	0.469	0.881	0.011	0.046	1.009	0	0.022	0
CG6287	0.543	1.532	0.219	0.923	0.743	0.952	0.432	0.831	1.015	0	0.732	0
CG11899	0.289	1.349	0.011	0.109	0.398	0.914	0.028	0.156	1.072	0	0.1	0
Hr4	0.007	1.005	0.002	0.538	0.016	0.613	0.004	0.43	1.095	0	0.579	0
ImpE1	0.125	1.161	0.004	0.019	0.185	0.638	0.01	0.032	1.106	0	0.014	0
Him	0.038	0.09	0.576	1.618	0.088	0.114	0.597	0.898	0.055	0.084	1.107	0
ImpE3	0.092	1.238	0.031	0.139	0.184	0.805	0.074	0.199	1.185	0	0.113	0
lncRNA:CR34335	4.493	5.407	4.037	4.773	1	1	1	1	1.194	0	0.916	0
Spn43Aa	0.15	1.442	0.005	0.04	0.205	0.591	0.013	0.066	1.35	0	0.035	0
Argk	1.722	2.599	0.097	1.396	0.882	0.999	0.219	0.465	0.912	0	1.373	0
ImpE2	0.479	3.716	0.013	0.344	0.261	0.963	0.034	0.476	3.378	0	0.325	0
