# Supplementary material for: Single-cell transcriptomics of the Drosophila wing disc reveals instructive epithelium-to-myoblast interactions
Source: eLife. 2021 Mar 22;10:e61276. doi: 10.7554/eLife.61276 (PMC8021398; doi:10.7554/eLife.61276)
Supplement: Supplementary file 2. — Genes were selected based on being significantly and consistently upregulated or downregulated between the two time points in at least one epithelial cluster. The natural-log of the fold-change between 96 and 120 hr is reported, averaged across each of the pairwise comparisons performed (see Materials and methods for details on differential expression between time points). Negative values indicate higher expression at 96 hr and are colored magenta. Positive values indicate higher expression at 120 hr and are colored green. Values that were not significant (based on max false discovery rate) are reported with a ‘-'. [file elife-61276-supp2.xlsx]

## Sheet: Supplementary file 2 - epirheli
	POUCH-WM	POUCH-1	POUCH-2	POUCH-3	POUCH-4	POUCH-5	POUCH-6	HINGE-inner-1	HINGE-inner-2	HINGE-inner-3	HINGE-outer-1	HINGE-outer-2	HINGE-outer-3	NOTUM-1	NOTUM-2	NOTUM-3	NOTUM-4	PE-1	PE-2	PE-3
chinmo	-0.487063	-0.557408	-0.43981	-0.662885	-0.985487	-0.982006	-0.858367	-0.954521	-1.13299	-0.953979	-0.86993	-1.31562	-0.904711	-0.911105	-0.672112	-0.70099	-0.535614	-0.88566	-1.08004	-0.903748
CG10527	-0.770297	-0.861574	-0.830946	-0.745932	-0.542174	-0.874314	-0.855073	-0.652208	-0.907022	-0.752636	-0.523125	-1.03186	-0.702368	-0.579291	-1.02396	-1.10644	-0.819426	-0.768748	-0.934046	-0.697606
CG15093	-0.546331	-0.453131	-0.52869	-0.548171	-0.526846	-0.611653	-0.391258	-0.958319	-0.846103	-0.834775	-0.810111	-0.71891	-0.690271	-0.832714	-0.789051	-0.91576	-0.579802	-0.908288	-0.564174	-0.595097
fru	-0.495865	-0.606223	-0.625907	-0.630924	-0.496584	-0.607691	-0.665818	-0.79064	-0.748867	-0.572627	-0.527207	-0.554449	-0.722794	-0.62813	-0.637737	-0.761278	-0.492654	-0.461056	-0.684382	-0.532542
SPARC	-0.817354	-0.688012	-0.589538	-0.425274	-0.599854	-0.558599	-0.578458	-0.569518	-0.520743	-0.513395	-0.469614	-0.507634	-0.590757	-0.598154	-0.50438	-0.517605	-0.56161	-0.578053	-0.90541	-0.561063
ab	-0.478579	-0.797371	-0.613048	-0.614709	-0.456173	-0.49787	-0.508494	-0.48743	-0.643577	-0.751576	-0.81301	-0.792902	-0.696007	-0.756757	-0.448736	-0.403912	-0.543611	-0.681858	-	-
Chd64	-	-0.529704	-0.604798	-0.486983	-0.252599	-0.558151	-0.613055	-0.639573	-0.633444	-0.550596	-0.348465	-0.611297	-0.515833	-0.362208	-0.615793	-0.418061	-0.38701	-0.403239	-0.494839	-0.48047
CG1648	-0.769596	-0.562889	-0.527079	-0.424693	-	-0.613311	-0.667627	-0.579833	-0.560075	-0.519054	-0.438847	-0.314231	-0.484499	-0.54891	-0.428102	-0.445235	-0.452489	-0.531523	-	-0.59873
CG14984	-1.0001	-0.866799	-0.65531	-0.823156	-0.54068	-0.530389	-0.212553	-	-0.249049	-0.289479	-	-0.351021	-0.282334	-0.350687	-0.492553	-0.391657	-0.513749	-0.551436	-0.424838	-0.317216
Aldh	-0.458279	-0.441378	-0.300514	-	-	-	-	-0.291748	-	-0.543758	-0.490715	-0.449009	-0.532922	-0.506475	-0.836599	-0.602587	-0.772823	-0.818705	-0.719963	-1.00621
Cpr49Ah	-0.559821	-0.291276	-0.355802	-	-1.52703	-1.8481	-0.879628	-1.06592	-1.00477	-1.17514	-	-	-	-	-	-	-	-	-	-
Jafrac1	-	-0.44732	-0.488213	-0.494933	-	-0.498622	-0.654631	-0.545166	-0.519652	-0.404055	-0.459149	-0.410001	-0.514657	-0.594971	-0.453472	-0.702983	-0.414406	-0.387163	-	-0.444225
Idgf4	-0.451807	-0.45267	-0.372489	-0.402805	-0.384575	-0.487055	-0.339747	-0.272975	-0.346531	-0.270596	-0.26958	-0.684883	-0.392583	-	-0.502457	-0.547982	-0.434877	-0.275984	-1.02806	0.475883
LamC	-	-0.468553	-0.415701	-0.496662	-0.521955	-0.509941	-0.413867	-	-0.256993	-0.318774	-0.224432	-0.409013	-0.290827	-0.394058	-0.422979	-0.582313	-0.466471	-0.520699	-0.68057	-
Imp	-	-0.273494	-0.214929	-0.233604	-0.331147	-0.354096	-0.406718	-0.447667	-0.612812	-0.434717	-0.350356	-0.487877	-0.387851	-0.489761	-0.336727	-0.293987	-0.318568	-0.395643	-0.374606	-0.432282
CG1572	-	-0.392304	-0.296494	-0.274516	-0.332668	-0.421722	-0.274968	-0.276619	-0.290347	-0.564036	-0.258255	-0.269087	-0.334439	-0.356173	-0.401802	-0.397591	-0.507648	-0.407047	-0.991965	-
GstD3	-0.238383	-0.401507	-0.497295	-0.410307	-0.349473	-0.448982	-0.485977	-0.521524	-0.43204	-0.411725	-0.253758	-0.66249	-0.380544	-0.327344	-0.322487	-0.310082	-	-	-0.562015	-
Gasp	-	-0.240821	-	-0.573212	-	-	-1.05314	-	-0.789792	-	-	-0.462675	-	-	-0.543161	-0.389145	-0.673396	-0.371446	-0.801525	-0.749127
hoip	-0.385843	-0.339156	-	-0.454083	-	-0.360765	-0.393007	-0.543062	-	-0.32731	-0.488452	-	-0.363052	-0.301414	-0.357833	-0.549443	-0.430079	-0.42047	-0.478418	-0.387943
sqd	-0.43174	-0.315451	-0.258417	-0.339184	-0.353365	-0.335386	-0.381749	-0.344198	-0.341382	-0.367515	-	-0.446996	-0.317595	-0.244041	-0.295464	-0.459456	-0.410543	-0.248152	-0.281213	-0.32421
SP1173	-0.39781	-0.354954	-	-0.414472	-0.307883	-0.392029	-0.463034	-0.428795	-0.389153	-0.388993	-0.204914	-	-0.378211	-0.269077	-0.307581	-0.224037	-0.273372	-0.439948	-0.274182	-0.318404
Vajk3	-2.39954	-1.20531	-1.2441	-0.960937	-	-	-	-	-	-	-	-	-	-	-	-	-	-	-	-
Vajk2	-2.04305	-1.26224	-1.3533	-0.951857	-	-	-	-	-	-	-	-	-	-	-	-	-	-	-	-
ps	-0.364519	-	-0.295018	-0.398889	-0.205546	-	-0.261413	-0.29278	-0.30479	-0.273494	-0.286343	-	-0.207908	-0.259731	-0.307488	-0.427437	-0.348425	-0.408785	-0.544882	-0.391377
dpy	-0.47303	-0.32491	-0.406174	-0.297607	-0.259396	-0.374162	-0.355645	-0.209635	-0.40798	-0.223714	-0.272162	-0.377224	-0.223357	-0.337779	-0.274113	-0.382048	-0.297657	-	-	-
REG	-	-0.256675	-0.299698	-0.315211	-0.248376	-0.327108	-0.319633	-0.431619	-0.374781	-0.258432	-0.304939	-0.444896	-0.283143	-	-0.321217	-0.457641	-0.33514	-	-0.242699	-0.274352
CG6767	-0.513997	-	-0.261119	-0.256378	-0.190727	-0.303633	-0.335515	-0.361594	-0.451539	-0.36162	-0.285827	-0.46249	-0.370026	-0.296343	-	-0.504416	-	-0.351226	-	-
Nop60B	-	-	-0.210636	-0.357868	-0.259241	-0.3649	-	-0.513695	-0.316488	-0.341696	-0.412145	-0.363253	-0.340148	-0.286152	-0.229825	-0.386776	-	-0.349715	-	-0.327289
CG1943	-	-	-	-0.285064	-0.307275	-0.436716	-0.277895	-0.445587	-0.466519	-0.444781	-0.348364	-	-0.327662	-0.372497	-0.334805	-0.528119	-	-	-0.219541	-0.24441
CNBP	-	-0.258695	-0.270216	-	-0.194762	-0.307643	-0.243269	-0.261877	-0.280322	-0.338409	-0.353352	-0.316832	-0.283108	-0.318007	-0.305545	-0.486241	-0.316515	-0.346853	-	-
Cam	-0.336619	-0.197511	-	-0.322755	-0.373176	-0.341633	-0.348232	-0.364421	-0.371397	-0.364575	-	-	-0.262264	-0.279504	-0.267215	-0.287644	-0.309061	-0.301843	-	-
Msp300	-0.400678	-0.329315	-0.387411	-	-	-0.36877	-	-	-	-0.38759	-0.443735	-	-	-0.405185	-0.584871	-0.408104	-0.434369	-0.507085	-	-
CG4038	-	-	-0.204041	-0.200563	-	-0.268537	-0.214673	-0.466925	-0.296351	-0.223031	-0.324612	-0.34781	-0.278332	-	-	-0.365577	-0.276663	-0.290757	-0.268682	-0.19572
CG9008	-	-0.548033	-0.487077	-0.623683	-0.339945	-0.511838	-0.872364	-0.527918	-	-	-	-0.215655	-	-	-	-	-	-	-	-
rgn	-	-0.278162	-	-	-	-0.33424	-0.393593	-0.420332	-0.531941	-0.42286	-0.340664	-	-0.361454	-	-	-0.392761	-	-	-0.421288	-
HP4	-0.427137	-	-	-0.225239	-	-	-	-0.334889	-0.311051	-0.21149	-0.317458	-0.299579	-0.254304	-0.287272	-0.319206	-0.274139	-0.337158	-0.220936	-	-
CG17765	-	-0.215999	-	-0.237655	-	-0.228274	-0.271762	-0.285008	-0.324177	-0.290876	-	-0.245569	-0.269764	-0.191608	-0.245226	-0.273238	-	-0.203989	-0.250545	-0.259194
hdc	-0.334173	-0.356568	-0.374834	-	-	-	-	-	-	-0.305305	-	-	-	-0.403345	-0.411046	-0.378456	-0.326793	-	-0.482115	-0.404842
RpL34a	-0.31168	-	-	-0.249096	-	-0.272056	-0.23906	-0.359633	-	-	-0.302722	-	-0.282573	-0.263557	-0.279578	-0.299914	-0.340177	-0.255447	-0.287937	-
Cyt-c-p	-	-0.285005	-	-	-	-	-0.379391	-0.425379	-0.233454	-	-0.259334	-	-0.311889	-0.29119	-0.287622	-0.344984	-0.360408	-0.276963	-0.246812	-
yellow-c	-	-0.214519	-0.215811	-0.181925	-	-	-	-	-0.255816	-0.22713	-0.260682	-0.267493	-0.269942	-0.271699	-0.200841	-0.222277	-	-0.319254	-0.373316	-0.418931
baf	-0.431479	-	-0.318285	-	-	-	-0.378972	-	-0.347975	-0.289604	-	-0.517968	-	-	-0.290826	-0.478727	-0.249626	-	-	-0.297548
Atf3	-	-0.217921	-	-	-0.250413	-0.264342	-0.258072	-	-	-0.243253	-0.236365	-	-0.235059	-0.223517	-0.250299	-0.256786	-0.207612	-0.178746	-0.375009	-0.323145
Adk2	-0.295157	-0.200528	-	-0.227854	-	-0.262306	-0.314592	-0.236072	-	-0.231717	-0.291235	-	-0.321849	-0.229801	-	-0.304322	-	-0.22272	-	-0.375672
Idgf6	-	-	-	-	-	-	-	-	-	-	-	-0.380736	-	-0.3844	-0.821901	-0.388053	-0.44289	-	-0.54175	-0.49903
bnb	-0.87316	-	-	-0.330796	-	-	-	-	-	-	-0.423675	-0.456974	-0.440951	-	-0.36818	-	-	-0.500592	0.245464	-0.295096
Nacalpha	-	-	-	-0.302091	-	-0.319179	-	-0.365229	-0.349444	-0.333362	-0.303901	-0.358154	-	-	-	-	-0.330325	-	-0.38305	-0.309048
His3.3A	-0.328609	-	-0.223981	-	-	-0.305663	-	-	-0.452383	-0.352405	-0.195152	-0.542017	-0.281126	-	-0.227992	-0.428807	-	-	-	-
Antp	-0.226394	-	-	-	-0.440197	-0.463331	-0.629938	-0.671413	-0.322042	-0.572146	-	-	-0.376282	-	-	-	-	0.416214	-	-
COX4	-	-0.225881	-	-0.286087	-0.247794	-	-0.293635	-	-0.267928	-	-0.234017	-0.275251	-	-0.258952	-	-0.314377	-0.289189	-0.292594	-	-0.270834
CG9782	-	-	-	-	-	-	-0.252569	-	-	-0.34943	-0.384385	-	-	-0.362841	-0.537727	-0.527303	-0.439497	-	-	-0.340355
CG30159	-	-	-	-0.293723	-	-0.362436	-	-0.354125	-	-	-	-0.466018	-0.349157	-0.307589	-0.247055	-0.413028	-	-	-	-0.236861
Mgstl	-0.30976	-0.269692	-0.308441	-0.338561	-0.373749	-0.290042	-0.316946	-0.227586	-	-	-	-	-	-	-	-	-	-0.294252	-0.290977	-
fabp	-0.327705	-0.281629	-	-	-0.368432	-0.31038	-0.321898	-0.357722	-0.349864	-0.41755	-	-	-	-	-	-	-	-	-	-0.24368
CG15784	-	-0.26128	-	-	-0.338623	-0.345588	-0.37066	-	-	-	-	-0.77213	-	-	-0.361278	-0.248845	-	-	-	-0.250901
Trx-2	-	-0.254405	-0.223562	-	-0.278991	-0.224166	-	-0.260604	-0.218415	-0.223662	-	-	-	-	-0.215537	-0.248317	-0.244911	-0.236835	-	-0.277277
CCT2	-	-0.217929	-0.183667	-	-	-0.284126	-0.235019	-	-0.195073	-0.261701	-0.216446	-	-0.251537	-0.199513	-0.227086	-0.354726	-	-0.250252	-	-
CG1354	-0.279751	-0.263372	-	-0.232047	-	-	-	-0.215402	-0.304539	-0.268304	-0.239521	-0.255387	-0.266017	-0.254826	-	-	-	-	-0.286113	-
Kank	-	-0.278692	-	-0.198158	-	-	-0.295916	-0.360751	-	-0.435901	-0.513387	-	-	-0.453029	-	-	-	-	-0.309502	-
CG9336	-	-	-	-	-	-	-	-	-	-	-	-	-	-0.195078	-0.257534	-	-0.209216	-0.518238	-0.836634	-0.729008
fj	-	0.349722	-	-	-0.210128	-0.411324	-	-	-0.364708	-	-	-0.28598	-	-	-	-0.687987	-0.420451	-	-0.615331	-
eIF2alpha	-	-0.16243	-	-0.248442	-	-0.222918	-0.175127	-0.237466	-0.27883	-0.268985	-0.196455	-0.393537	-	-0.210988	-	-	-0.189985	-	-	-
Flo1	-	-0.188295	-	-0.254507	-	-0.271741	-	-	-0.201794	-0.32042	-	-0.214602	-0.257909	-0.255888	-	-	-	-0.331803	-0.251382	-
Cyp310a1	-0.633548	-0.327537	-0.560189	-0.649124	-	-0.360336	-	-	-	-	-	-	-	-	-	-	-	-	-	-
Pdp1	-	-	-	-0.303318	-0.211136	-	-0.215698	-	-	-	-	-0.26324	-	-0.220856	-0.254799	-0.263539	-	-0.268731	-0.251801	-0.264907
nw	-	-	-0.243098	-	-	-	-0.296671	-0.348056	-0.290105	-0.260467	-	-	-	-	-	-0.525616	-0.53191	-	-	-
nop5	-	-	-	-	-	-	-	-0.358216	-	-	-0.324785	-0.298201	-0.255001	-	-	-0.363403	-0.264575	-0.256641	-0.355759	-
Mpcp2	-	-	-	-	-0.237826	-0.227246	-	-0.237145	-0.234989	-	-	-0.315555	-0.291354	-	-0.259943	-	-	-0.219787	-	-0.281076
His2Av	-0.396161	-	-	-	-	-0.264474	-	-	-0.282182	-0.231666	-	-0.606263	-	-	-	-0.436525	-	-	-	-
p23	-	-	-	-0.276456	-	-	-0.220424	-	-0.259583	-	-0.256126	-0.325699	-	-	-0.230519	-0.340726	-	-	-0.199275	-
zld	-	-	-0.270092	-0.275603	-0.32539	-	-0.279688	-0.282737	-	-	-	-	-	-0.303911	-	-	-	-	-0.282773	-
Df31	-0.252755	-	-	-0.204298	-	-0.224857	-0.226098	-	-0.270432	-0.235356	-	-0.28807	-	-	-	-0.293659	-	-	-	-
CG31673	-	-0.263396	-0.220074	-0.270539	-0.270247	-0.226517	-0.23986	-	-	-0.186038	-	-	-	-0.250397	-	-	-	-	-	-
Osi14	-	-	-	-	-0.96607	-0.95667	-	-	-	-	-	-	-	-	-	-	-	-	-	-
bic	-0.354377	-	-	-	-	-	-	-0.422366	-	-	-0.38057	-	-	-	-	-	-	-	-0.415018	-0.346927
Fkbp39	-0.435536	-	-	-	-	-	-	-	-0.24603	-	-	-0.325008	-0.243045	-	-	-0.37635	-	-	-0.232705	-
CG3226	-	-0.20846	-	-	-	-	-0.299613	-	-	-	-	-0.259776	-	-	-0.223917	-0.399621	-0.230305	-	-0.236114	-
BthD	-	-0.205849	-	-	-	-	-0.238825	-0.331458	-	-0.215813	-	-	-	-0.277644	-0.3196	-	-	-0.224521	-	-
Nap1	-	-	-	-	-	-	-0.253133	-	-0.274438	-0.263596	-0.270023	-	-	-	-	-0.27755	-0.241854	-	-	-0.220063
nahoda	-	-	-	-	-	-	-	-	-	-0.220049	-	-0.27557	-0.188998	-	-0.248486	-	-	-0.270925	-0.291932	-0.292721
CG9932	-	-	-	-	-	-0.328682	-	-	-	-	-	-	-	-0.194444	-	-	-0.314104	-0.427671	-0.520715	-
Nmdmc	-	-	-	-0.246769	-	-	-	-0.295284	-	-	-0.263961	-	-0.214275	-	-0.235142	-	-0.284251	-	-0.24557	-
Sirup	-	-	-	-	-	-	-	-	-	-	-	-	-	-0.437293	-0.485123	-0.407375	-	-	-	-0.400793
rpr	-	-0.303292	-0.25814	-	-	-	-0.266026	-	-	-	-	-0.371487	-0.202875	-0.2321	-	-	-	-	-	-
CG1542	-	-	-	-	-	-	-0.248434	-0.302116	-	-	-	-	-	-	-	-0.264763	-0.286037	-	-0.266535	-0.258617
mRpL12	-	-	-	-	-	-	-	-0.27491	-0.250838	-	-	-0.284862	-	-	-0.245729	-0.302261	-	-0.235924	-	-
Ude	-	-	-	-	-	-	-	-	-	-	-	-	-0.217192	-	-0.305193	-	-	-0.269357	-0.269864	-0.448222
Cks30A	-	-	-	-	-	-	-	-0.3311	-0.382318	-0.33148	-	-	-	-	-	-0.445842	-	-	-	-
ATPsynO	-	-	-	-0.277596	-	-	-0.244609	-	-	-0.197735	-	-0.239248	-	-	-	-0.282769	-	-0.217082	-	-
Clect27	-	-	-	-	-0.356642	-	-	-	-	-	-	-	-	-	-	-0.574566	-0.514716	-	-	-
Desat1	-	-	-	-	-0.228883	-0.256892	-	-	-	-0.277861	-0.212512	-	-	-0.23256	-	-0.217858	-	-	-	-
dUTPase	-0.367895	-	-	-	-	-	-0.268117	-	-0.273538	-	-	-	-	-	-	-0.512753	-	-	-	-
Tina-1	-	-	-0.163892	-	-	-	-	-	-	-	-	-	-0.229008	-0.234977	-	-	-	-0.190733	-0.275821	-0.302295
Prosalpha7	-	-0.193384	-	-0.235837	-	-	-	-0.249821	-0.244872	-	-	-	-	-	-0.172907	-0.224505	-	-	-	-
AnxB9	-0.436344	-	-	-	-	-	-	-	-0.311577	-0.259068	-	-0.303689	-	-	-	-	-	-	-	-
GstD1	-	-	-0.263775	-	-	-0.206814	-0.172231	-	-0.240581	-	-	-0.198474	-	-	-	-	-	-	-0.207213	-
D1	-	-	-	-	-	-	-	-	-0.2339	-0.191358	-	-0.344516	-	-	-	-0.325723	-0.189441	-	-	-
dj-1beta	-0.219586	-	-	-	-	-	-	-	-	-0.284853	-	-	-0.22029	-	-0.263222	-0.283786	-	-	-	-
Qsox2	-	-	-	-	-	-	-	-	-	-	-	-	-	-	-0.319711	-0.332657	-	-0.227492	-0.388956	-
Cbs	-	-	-0.203709	-0.292624	-0.316765	-	-0.226582	-	-	-0.223355	-	-	-	-	-	-	-	-	-	-
ATPsyndelta	-	-0.18389	-	-	-	-	-0.282499	-	-	-	-	-	-	-	-0.2194	-0.273527	-	-0.254633	-	-
Bub3	-0.330663	-	-	-0.255544	-	-	-	-0.228431	-	-	-	-0.32808	-	-	-	-	-	-	-	-
CG12814	-0.578252	-0.26279	-0.275027	-	-	-	-	-	-	-	-	-	-	-	-	-	-	-	-	-
CG9338	-	-	-	-	-	-	-	-	-	-	-	-	-	-	-	-0.217224	-	-	-0.503771	-0.394564
Pfdn2	-	-	-	-	-	-	-	-	-0.248463	-	-0.223896	-0.249857	-	-	-	-0.188659	-	-0.20074	-	-
CG7294	-	-0.29161	-0.281728	-	-	-0.208754	-	-	-	-	-	-	-	-	-	-	-	-	-	-0.300263
vig2	-	-	-	-0.190167	-	-	-	-0.220205	-	-	-0.222829	-0.247322	-	-	-	-	-	-	-0.20065	-
CG11267	-	-	-	-	-	-	-0.234954	-	-	-	-	-0.275931	-	-	-	-	-	-	-0.312718	-0.252496
Mlc2	-	-	-0.197883	-	-	-	-0.328613	-	-	-	-	-	-	-	-	-	-	-0.517406	-	-
CG12268	-	-0.274355	-	-0.267467	-0.238799	-	-	-0.25673	-	-	-	-	-	-	-	-	-	-	-	-
ND-B17	-	-	-	-	-	-	-	-	-0.288843	-	-	-0.315721	-	-	-	-0.232047	-	-0.184739	-	-
Ahcy	-	-	-	-	-	-0.239673	-	-	-	-	-	-0.290688	-	-	-0.252546	-	-	-	-0.233069	-
CG34417	-	-	-	-	-	-	-0.27973	-	-	-	-	-	-	-0.311115	-0.209899	-	-	-0.188814	-	-
CG8740	-	-	-	-	-	-	-	-	-	-	-	-	-	-0.335998	-0.338121	-	-	-	-0.314031	-
trol	-0.194665	-	-	-	-	-	-	-	-	-	-	-0.245342	-	-	-	-0.260561	-0.279466	-	-	-
RpL9	-	-	-	-	-	-	-	-	-	-	-	-0.484238	-	-	-	-	-	-	-0.495583	-
CG14434	-	-	-	-	-	-	-	-	-	-	-	-0.356119	-	-	-0.228572	-0.37653	-	-	-	-
CG1416	-	-	-	-	-	-	-	-	-0.247788	-	-0.20389	-0.312822	-	-	-	-	-	-	-	-0.195761
RpS3	-	-	-	-	-	-	-	-	-	-	-	-0.493167	-0.4637	-	-	-	-	-	-	-
Ran	-	-	-	-	-	-	-0.26089	-	-	-	-	-0.337185	-	-	-	-0.358417	-	-	-	-
Prx3	-	-	-	-	-	-0.20349	-	-	-	-	-	-0.280728	-	-	-0.225114	-0.246798	-	-	-	-
CG5903	-	-	-	-	-	-0.213017	-	-	-	-	-	-0.276607	-	-	-	-	-0.263428	-0.198618	-	-
Sam-S	-	-	-	-	-	-0.202662	-	-0.261638	-0.417255	-	-	-	-0.2243	-	-	-	-	-	-	0.15588
Tom40	-0.239542	-	-	-	-	-	-	-	-	-	-	-	-	-	-0.201469	-0.223369	-	-0.256082	-	-
AdamTS-B	-	-	-	-	-	-	-0.312181	-	-	-	-0.267723	-0.335362	-	-	-	-	-	-	-	-
Tspo	-	-	-	-0.237042	-0.243707	-	-	-	-	-	-	-	-	-0.242462	-0.186878	-	-	-	-	-
RpA-70	-	-	-	-	-	-	-	-0.214308	-	-0.234735	-0.23243	-	-	-0.219312	-	-	-	-	-	-
COX5A	-	-	-	-	-	-	-	-	-	-	-	-	-	-	-	-0.371873	-0.305885	-	-0.200916	-
HmgD	-	-	-	-	-	-	-	-	-	-	-	-0.470422	-	-	-	-0.400232	-	-	-	-
CG13631	-	-	-	-	-	-	-	-	-	-	-	-	-	-	-	-	-0.213871	-	-0.29666	-0.341416
CG6084	-	-	-	-	-0.17676	-0.194918	-	-	-	-0.2477	-	-	-0.218878	-	-	-	-	-	-	-
CG9253	-	-	-	-	-	-	-	-0.226437	-	-	-	-	-	-	-	-	-0.168969	-0.189815	-0.251396	-
slow	-	-	-	-	-	-	-	-	-	-	-	-	-	-	-0.490188	-	-	-	-	-0.333978
eIF1A	-	-	-	-	-	-	-	-	-0.282264	-	-	-	-0.217191	-0.164324	-	-0.157994	-	-	-	-
CG12643	-0.304055	-	-	-	-	-	-	-	-	-	-	-	-	-0.317248	-	-	-	-	-	-0.199291
mol	-	-	-	-	-0.201369	-0.220735	-0.179119	-0.206974	-	-	-	-	-	-	-	-	-	-	-	-
yellow-e3	-	-	-	-	-	-	-	-0.389401	-0.37988	-	-	-	-	-	-	-	-	-	-	-
mod	-	-	-	-0.22481	-	-	-	-0.292631	-	-	-0.25043	-	-	-	-	-	-	-	-	-
Nlp	-	-	-	-0.183852	-	-	-	-	-	-	-	-0.317173	-	-	-	-0.263464	-	-	-	-
CG6523	-	-	-	-	-	-	-	-	-0.223432	-	-0.180488	-0.358036	-	-	-	-	-	-	-	-
Gapdh1	-	-	-	-	-	-	-	-	-	-0.258661	-	-	-	-	-0.268256	-0.232961	-	-	-	-
COX7A	-	-	-	-	-	-	-0.247577	-	-	-	-	-0.316867	-	-0.19541	-	-	-	-	-	-
Set	-	-	-	-	-	-	-	-	-	-	-	-0.423639	-	-	-	-0.335541	-	-	-	-
CG15611	-	-	-	-	-	-	-	-	-	-	-	-0.447758	-	-	-	-	-	-	-0.291995	-
mgr	-	-0.197942	-	-	-	-	-	-	-	-	-	-	-	-	-	-0.174814	-0.174241	-	-0.179815	-
Gdh	-	-	-	-	-	-	-	-	-	-0.345232	-	-0.379966	-	-	-	-	-	-	-	-
Tsp42Ea	-	-	-	-	-0.272254	-	-	-	-	-	-	-	-	-	-	-	-	-	-	-0.442252
Dph5	-0.211274	-	-	-	-	-	-	-	-	-0.211301	-	-	-	-	-	-0.290759	-	-	-	-
Su(var)205	-	-	-	-	-	-0.190679	-	-	-0.226488	-	-	-	-	-	-	-0.282741	-	-	-	-
SmD2	-	-	-	-	-	-	-	-	-	-	-	-0.400478	-	-	-	-0.294706	-	-	-	-
Cyp1	-	-	-	-0.204175	-	-	-	-	-	-	-	-	-	-	-	-0.250588	-0.218048	-	-	-
RpL5	-	-	-	-	-	-	-	-	-	-	-	-	-0.313572	-	-	-	-	-	-0.357864	-
Prosbeta2	-	-	-	-0.236629	-	-	-	-	-	-	-	-	-	-	-	-0.219664	-	-0.207939	-	-
stg	0.726075	-	-	-	-	-	-0.507408	0.179337	-	-	-	-	-	-	-	-0.527552	-	-	-	-0.526761
NHP2	-	-	-	-	-	-	-	-0.317055	-	-	-	-	-	-	-	-	-	-	-0.33057	-
Caf1-180	-	-	-	-	-	-	-	-0.229331	-0.222751	-0.183109	-	-	-	-	-	-	-	-	-	-
CG9328	-0.431884	-	-	-	-	-	-	-	-0.199672	-	-	-	-	-	-	-	-	-	-	-
RpL4	-	-	-	-	-	-	-	-	-	-	-	-0.315983	-	-	-	-	-	-	-0.3114	-
Gip	-	-	-	-	-0.197145	-	-	-	-	-	-	-0.23525	-	-0.194108	-	-	-	-	-	-
awd	-	-	-	-	-	-	-	-	-	-	-	-0.308837	-	-	-	-0.309424	-	-	-	-
dap	-0.373701	-	-	-	-	-	-	-	-0.24084	-	-	-	-	-	-	-	-	-	-	-
Fib	-	-	-	-	-	-	-	-	-	-	-	-	-	-	-	-0.234629	-	-	-0.36308	-
ND-B14.7	-	-	-	-	-	-	-	-	-	-	-0.294133	-	-	-	-	-	-0.294309	-	-	-
beta-Spec	-	-	-	-	-	-	-	-	-	-	-	-	-	-0.165008	-	-0.228896	-0.194138	-	-	-
bun	-	-	-0.29764	-	-	-	-	-	-	-	-	-	-	-	-0.279777	-	-	-	-	-
msb1l	-	-	-	-	-	-	-	-	-	-	-	-0.274145	-	-	-	-0.292806	-	-	-	-
cher	-	-	-	-	-	-	-	-	-	-	-	-	-	-	-	-	-0.230707	-	-	-0.332809
Nop56	-	-	-	-	-	-	-	-0.276037	-	-	-	-	-	-	-	-	-	-	-0.28603	-
CG42813	-	-	-	-	-	-	-	-	-	-	-	-	-	-	-0.293264	-	-0.265704	-	-	-
CG3777	-0.318941	-	-	-0.23606	-	-	-	-	-	-	-	-	-	-	-	-	-	-	-	-
CG34445	-	-	-	-	-	-	-	-	-	-	-	-	-	-	-	-	-	-	-0.197398	-0.351126
Oatp74D	-	-	-	-	-	-	-	-	-	-	-0.248411	-	-	-	-	-	-	-0.298355	-	-
mRpL44	-	-	-	-	-	-	-	-	-	-	-	-	-	-	-	-0.280084	-	-0.262685	-	-
CG1910	-	-	-	-	-	-	-	-	-	-	-	-0.285521	-	-	-	-0.254266	-	-	-	-
RPA2	-0.317062	-	-	-	-	-	-	-	-	-	-	-	-	-0.221149	-	-	-	-	-	-
mago	-0.30954	-	-	-	-	-	-	-	-	-	-	-	-	-	-	-0.227537	-	-	-	-
CG17108	-	-	-	-	-	-	-	-	-	-	-	-	-	-	-	-	-	-0.534204	-	-
nudC	-	-	-	-	-	-	-	-	-	-	-	-	-	-0.21081	-	-0.308697	-	-	-	-
RfC4	-0.269165	-	-	-	-	-	-	-	-	-	-	-	-	-	-	-0.246146	-	-	-	-
CG6937	-	-	-	-	-	-	-	-	-	-	-	-	-	-	-	-0.272287	-0.240273	-	-	-
eIF3b	-	-	-	-	-	-	-	-0.237849	-0.273973	-	-	-	-	-	-	-	-	-	-	-
RanGAP	-	-	-	-	-	-	-	-	-	-	-	-0.270683	-	-	-	-0.239323	-	-	-	-
CG9752	-0.26478	-	-	-	-	-	-	-	-	-	-	-	-	-	-	-0.23994	-	-	-	-
Ote	-	-	-	-	-	-	-	-	-0.239996	-	-	-	-	-	-	-0.263533	-	-	-	-
CG32409	-0.243135	-	-	-	-	-	-	-	-	-	-	-	-	-	-	-	-	-	-0.259301	-
RpS18	-	-	-	-	-	-	-	-	-	-	-	-0.501421	-	-	-	-	-	-	-	-
CG10863	-	-	-	-	-	-0.202599	-	-	-	-	-	-	-	-	-	-	-	-	-	-0.297844
jim	-0.270059	-	-	-	-	-	-	-	-	-	-	-	-	-	-	-	-	-	-	-0.226634
Prosalpha6	-	-	-	-0.221697	-	-	-	-	-	-	-	-	-	-	-	-0.270802	-	-	-	-
Pabp2	-	-0.227577	-	-	-	-	-	-	-	-	-	-	-	-	-	-0.258692	-	-	-	-
yellow-b	-	-	-	-	-	-	-	-	-	-	-	-	-	-	-	-	-	-	-0.310746	-0.171843
AdSS	-	-	-	-	-	-	-	-	-	-	-	-	-	-	-	-	-0.17803	-	-0.293447	-
RpL19	-	-	-	-	-	-	-	-	-	-	-	-0.46109	-	-	-	-	-	-	-	-
mfas	-	-	-	-	-	-	-	-	-	-0.456889	-	-	-	-	-	-	-	-	-	-
Glo1	-	-	-	-	-	-0.225089	-	-	-	-	-	-	-	-	-	-0.231102	-	-	-	-
RpS23	-	-	-	-	-	-	-	-	-	-	-	-0.440768	-	-	-	-	-	-	-	-
CG11555	-	-	-	-	-	-	-	-0.204261	-	-	-	-	-	-	-	-0.233227	-	-	-	-
mRpS30	-	-	-	-	-	-	-	-	-0.176444	-	-	-0.256928	-	-	-	-	-	-	-	-
eIF6	-	-	-	-0.240844	-	-	-	-	-0.189248	-	-	-	-	-	-	-	-	-	-	-
CG14812	-	-	-	-	-	-	-	-	-	-	-	-	-	-	-	-	-0.231244	-0.181465	-	-
Non3	-	-	-	-	-	-	-	-0.217738	-	-	-	-	-	-	-	-	-	-	-0.194882	-
Cdk1	-	-	-0.197607	-	-	-	-	-	-0.2141	-	-	-	-	-	-	-	-	-	-	-
eIF3h	-	-	-	-	-	-	-	-	-	-0.178202	-	-0.2313	-	-	-	-	-	-	-	-
ATPsynB	-	-	-	-	-	-	-	-	-	-	-0.227763	-	-	-	-	-	-	-	-	-0.177119
ND-ACP	-	-	-	-	-	-	-	-	-	-	-	-	-0.186407	-	-	-0.217511	-	-	-	-
lolal	-	-	-	-	-0.19328	-	-0.207567	-	-	-	-	-	-	-	-	-	-	-	-	-
Gart	-0.400508	-	-	-	-	-	-	-	-	-	-	-	-	-	-	-	-	-	-	-
RpS19a	-	-	-	-	-	-	-	-	-	-	-	-0.399282	-	-	-	-	-	-	-	-
ND-20	-	-	-	-	-	-	-	-	-	-	-	-	-	-	-	-0.184035	-	-0.2078	-	-
SpdS	-	-	-	-0.185978	-	-	-	-	-	-	-0.202366	-	-	-	-	-	-	-	-	-
Hsc70-5	-	-	-	-	-	-	-0.186166	-	-	-	-	-	-0.200203	-	-	-	-	-	-	-
CG8547	-	-	-	-	-	-	-	-	-	-	-	-	-	-	-	-	-	-	-0.381278	-
RpL8	-	-	-	-	-	-	-	-	-	-	-	-0.371603	-	-	-	-	-	-	-	-
RpL21	-	-	-	-	-	-	-	-	-	-	-	-0.36836	-	-	-	-	-	-	-	-
lncRNA:CR44334	-	-0.245651	-	-	-	-	-	0.300062	-	-	-	-0.422443	-	-	-	-	-	-	-	-
eEF1delta	-	-	-	-0.184065	-	-	-	-	-	-	-	-0.183909	-	-	-	-	-	-	-	-
msd5	-	-	-	-	-	-	-	-	-	-	-	-	-	-	-	-0.204239	-	-0.162497	-	-
CG5757	-0.363323	-	-	-	-	-	-	-	-	-	-	-	-	-	-	-	-	-	-	-
Uhg5	-	-	-	-	-	-	-	-	-0.356221	-	-	-	-	-	-	-	-	-	-	-
RpS8	-	-	-	-	-	-	-	-	-	-	-	-0.354616	-	-	-	-	-	-	-	-
babos	-	-	-	-	-	-0.273775	-	-	-0.264185	-	-	-	-	-	-	0.426507	-	-	-0.24154	-
CG42232	-	-	-	-	-	-	-	-	-	-	-	-	-	-	-0.166841	-0.180343	-	-	-	-
Fkbp59	-	-	-	-	-	-0.158173	-	-	-0.187337	-	-	-	-	-	-	-	-	-	-	-
tfc	-	-	-	-	-	-	-	-0.342905	-	-	-	-	-	-	-	-	-	-	-	-
RpL35A	-	-	-	-	-	-	-	-	-	-	-	-0.337707	-	-	-	-	-	-	-	-
dpn	-	-	-	-	-	-	-	-0.328066	-	-	-	-	-	-	-	-	-	-	-	-
E(spl)m8-HLH	-	-	-	-	-	-	-	-	-	-	-0.234207	0.158056	-	-0.245004	-	-	-	-	-	-
Nph	-	-	-	-	-	-	-	-	-	-	-	-	-	-	-	-0.31897	-	-	-	-
GstE11	-	-	-	-	-	-	-	-	-	-0.312295	-	-	-	-	-	-	-	-	-	-
GstE6	-	-	-	-	-	-0.311197	-	-	-	-	-	-	-	-	-	-	-	-	-	-
CG43341	-	-	-	-	-	-	-	-	-	-	-	-	-	-	-	-	-	-	-	-0.30619
Obp83g	-	-	-	-	-	-	-	-	-	-	-	-	-	-	-	-	-0.301637	-	-	-
Rbm13	-	-	-	-	-	-	-	-0.300937	-	-	-	-	-	-	-	-	-	-	-	-
Aos1	-	-	-	-	-	-	-	-	-	-	-	-	-	-	-	-0.300704	-	-	-	-
E(spl)m7-HLH	0.41189	-	-	-	-	-	-	-	-	-	-	-	-0.194186	-0.317608	-0.20006	-	-	-	-	-
mRpL2	-	-	-	-	-	-	-	-	-	-	-	-0.291813	-	-	-	-	-	-	-	-
CG31548	-	-	-	-	-	-	-	-	-	-	-	-0.286125	-	-	-	-	-	-	-	-
RpLP1	-	-	-	-	-	-	-	-	-	-	-	-0.283239	-	-	-	-	-	-	-	-
Rbp1	-	-	-	-	-	-	-	-	-	-	-	-	-	-	-	-0.281454	-	-	-	-
aurB	-	-	-	-	-	-	-	-	-0.280939	-	-	-	-	-	-	-	-	-	-	-
san	-	-	-	-	-	-	-	-0.278234	-	-	-	-	-	-	-	-	-	-	-	-
RpL13	-	-	-	-	-	-	-	-	-	-	-	-0.275539	-	-	-	-	-	-	-	-
CG11076	-	-	-	-	-	-	-	-	-	-	-	-	-	-	-	-0.2751	-	-	-	-
SmD1	-	-	-	-	-	-	-	-	-	-	-	-0.273889	-	-	-	-	-	-	-	-
asf1	-	-	-	-	-	-	-	-	-	-	-	-	-	-	-	-0.273866	-	-	-	-
Esyt2	-	-	-	-	-	-	-	-	-	-	-	-	-	-	-	-	-	-	-	-0.272184
Dlc90F	-	-	-	-	-	-	-	-	-	-	-	-0.270389	-	-	-	-	-	-	-	-
CG13096	-	-	-	-	-	-	-	-0.263877	-	-	-	-	-	-	-	-	-	-	-	-
DCTN3-p24	-	-	-	-	-	-	-	-	-	-	-	-0.263136	-	-	-	-	-	-	-	-
tum	-	-	-	-	-	-	-	-	-	-	-	-	-	-	-	-0.260139	-	-	-	-
La	-	-	-	-	-	-	-	-0.259552	-	-	-	-	-	-	-	-	-	-	-	-
ATPsynE	-	-	-	-	-	-	-	-	-	-	-	-0.259075	-	-	-	-	-	-	-	-
eIF3j	-	-	-	-	-	-	-	-	-	-	-	-0.258463	-	-	-	-	-	-	-	-
Ntf-2	-	-	-	-	-	-	-	-	-	-	-	-	-	-	-	-0.258095	-	-	-	-
Art1	-	-	-	-	-	-	-	-	-	-	-	-	-	-	-	-0.25759	-	-	-	-
mRpS24	-	-	-	-	-	-	-	-	-	-	-	-0.255747	-	-	-	-	-	-	-	-
porin	-	-	-	-	-	-	-	-	-	-	-	-0.251927	-	-	-	-	-	-	-	-
Ip259	-	-	-	-	-	-	-	-	-	-	-	-	-	-	-	-	-	-	-	-0.251919
Pgam5	-	-	-	-	-	-	-	-	-	-	-	-	-	-	-	-0.251439	-	-	-	-
Cisd2	-	-	-	-	-	-	-	-	-	-	-	-	-	-	-	-0.250716	-	-	-	-
CycB	-	-	-	-	-	-	-	-	-	-	-	-0.248294	-	-	-	-	-	-	-	-
Csl4	-	-	-	-	-	-	-	-	-	-	-	-0.247999	-	-	-	-	-	-	-	-
CG9205	-	-	-	-	-	-	-	-	-	-	-	-	-	-	-	-0.244275	-	-	-	-
RhoGDI	-	-	-	-	-	-	-	-0.24408	-	-	-	-	-	-	-	-	-	-	-	-
ea	-	-	-	-	-	-	-	-	-	-	-	-0.242336	-	-	-	-	-	-	-	-
scaf	-	-	-	-	-	-	-	-0.239624	-	-	-	-	-	-	-	-	-	-	-	-
Thor	-	-	-	-	-	-	-	-	-	-	-	-	-	-	-	-	-	-	-0.23654	-
Prosbeta7	-	-	-	-	-	-	-	-	-	-	-	-0.236034	-	-	-	-	-	-	-	-
GstD9	-	-	-	-	-	-	-	-	-0.234655	-	-	-	-	-	-	-	-	-	-	-
Rcc1	-	-	-	-	-	-	-	-	-	-	-	-0.233139	-	-	-	-	-	-	-	-
ND-24	-	-	-	-	-	-	-	-	-0.231609	-	-	-	-	-	-	-	-	-	-	-
14-3-3zeta	-	-	-	-	-	-	-	-	-	-	-	-0.229747	-	-	-	-	-	-	-	-
mip40	-	-	-	-	-	-	-	-0.228614	-	-	-	-	-	-	-	-	-	-	-	-
msd1	-	-	-	-	-	-	-	-	-	-	-	-	-	-	-	-0.227083	-	-	-	-
mbm	-	-	-	-	-	-	-	-	-	-	-	-	-	-	-	-	-	-0.225903	-	-
Tom20	-	-	-	-	-	-	-	-	-	-	-	-	-	-	-	-	-0.224706	-	-	-
smt3	-	-	-	-	-	-	-	-	-	-	-	-0.22459	-	-	-	-	-	-	-	-
Cht7	-	-	-	-	-	-	-	-0.223981	-	-	-	-	-	-	-	-	-	-	-	-
Pax	-	-	-	-	-	-	-	-	-	-	-	-	-	-	-	-	-	-	-0.223761	-
Rbfox1	-	-	-	-	-	-	-	-	-	-	-	-	-	-	-	-	-	-	-0.222706	-
eIF3e	-	-	-	-	-	-	-	-	-	-	-	-	-	-	-	-	-	-	-0.217742	-
Sf3a2	-	-	-	-	-	-	-	-0.217348	-	-	-	-	-	-	-	-	-	-	-	-
CG12909	-	-	-	-	-	-	-	-	-	-	-	-0.216587	-	-	-	-	-	-	-	-
CG4069	-	-	-	-	-	-	-	-	-	-	-	-	-	-	-	-0.216017	-	-	-	-
Fkbp12	-	-	-	-	-	-	-	-	-	-	-	-	-	-	-	-0.214867	-	-	-	-
sub	-	-	-	-	-	-	-	-0.21397	-	-	-	-	-	-	-	-	-	-	-	-
CG18081	-	-	-	-	-	-	-	-	-0.212458	-	-	-	-	-	-	-	-	-	-	-
AIMP1	-	-	-	-	-	-	-	-	-	-	-	-	-	-	-	-	-0.212299	-	-	-
REPTOR	-	-	-	-	-	-	-	-	-	-	-	-0.212061	-	-	-	-	-	-	-	-
ATPsyngamma	-	-	-	-	-	-	-	-	-	-	-	-0.211061	-	-	-	-	-	-	-	-
GMF	-	-	-	-	-	-	-	-	-	-	-	-0.209911	-	-	-	-	-	-	-	-
Cht6	-	-	-	-	-	-	-	-	-	-	-	-	-	-	-	-	-	-	-	-0.209763
CG17734	-	-	-	-	-	-	-	-0.209739	-	-	-	-	-	-	-	-	-	-	-	-
CG9436	-	-	-	-	-	-	-	-	-	-	-	-	-	-0.207803	-	-	-	-	-	-
CG4593	-	-	-	-	-	-	-	-	-	-	-	-	-	-	-0.206158	-	-	-	-	-
CCT3	-	-	-	-	-	-	-	-	-	-	-	-	-	-	-	-	-	-	-0.203913	-
CG6310	-	-	-	-	-	-	-	-	-	-0.202553	-	-	-	-	-	-	-	-	-	-
RpL24-like	-	-	-	-	-	-	-	-0.202367	-	-	-	-	-	-	-	-	-	-	-	-
CG1785	-	-	-	-	-	-	-	-0.202357	-	-	-	-	-	-	-	-	-	-	-	-
CG11563	-	-	-	-	-	-	-	-	-	-	-	-0.202236	-	-	-	-	-	-	-	-
bonsai	-	-	-	-	-	-	-	-	-	-	-	-	-	-	-0.201229	-	-	-	-	-
asRNA:CR45874	-	-	-	-	-	-	-	-	-0.201141	-	-	-	-	-	-	-	-	-	-	-
CG14966	-	-	-	-	-	-	-	-	-	-	-	-0.200261	-	-	-	-	-	-	-	-
E(spl)mgamma-HLH	-	-	-	-	-	-	-	-0.19952	-	-	-	-	-	-	-	-	-	-	-	-
comm2	-	-	-	-	-	-	-	-	-	-	-	-	-	-	-0.199318	-	-	-	-	-
CG18600	-	-	-	-	-	-	-	-	-	-	-	-	-	-	-	-	-	-0.199205	-	-
CG1890	-0.198624	-	-	-	-	-	-	-	-	-	-	-	-	-	-	-	-	-	-	-
exp	-	-	-	-	-0.196814	-	-	-	-	-	-	-	-	-	-	-	-	-	-	-
CG11151	-	-	-	-	-	-	-	-	-	-	-	-	-	-	-	-	-	-	-0.196764	-
Vha16-1	-	-	-	-0.195553	-	-	-	-	-	-	-	-	-	-	-	-	-	-	-	-
RpLP0-like	-	-	-	-	-	-	-	-	-	-	-	-	-	-	-	-0.194172	-	-	-	-
verm	-	-	-	-	-0.365534	-0.354881	-	-	-	-	-	-	-	1.07044	-	-	-	-	-0.538642	-
Gyg	-	-	-	-	-	-	-	-	-	-	-	-	-	-	-	-0.188128	-	-	-	-
mRpS10	-	-	-	-	-	-	-	-	-	-	-	-	-	-	-	-	-0.187538	-	-	-
pit	-	-	-	-	-	-	-	-	-	-	-	-	-0.185874	-	-	-	-	-	-	-
HP1b	-	-	-	-	-	-	-	-	-0.184723	-	-	-	-	-	-	-	-	-	-	-
CG14543	-	-	-	-	-	-	-	-	-	-	-	-	-	-	-	-0.184719	-	-	-	-
Mcm7	-	-	-	-	-	-	-	-	-	-	-	-	-	-	-	-0.18451	-	-	-	-
Art3	-	-	-	-	-	-	-	-	-	-	-	-	-	-	-	-0.178916	-	-	-	-
Rrp46	-	-	-	-	-	-	-	-	-	-	-	-	-	-	-	-0.169659	-	-	-	-
CG5515	-	-	-	-	-	-	-0.168926	-	-	-	-	-	-	-	-	-	-	-	-	-
CG12288	-	-	-	-	-	-	-	-0.168662	-	-	-	-	-	-	-	-	-	-	-	-
Hat1	-	-	-	-	-	-	-	-0.167989	-	-	-	-	-	-	-	-	-	-	-	-
HUWE1	-	-	-	-	-	-	-	-	-	-	-	-	-	-	-	-0.165012	-	-	-	-
Uev1A	-	-	-	-	-	-0.162628	-	-	-	-	-	-	-	-	-	-	-	-	-	-
cv-c	-	-	-	-	-	-0.209788	-	-	-0.278965	-	-	-	-	-	-	-	-	-	-	0.406693
vg	-	-	-0.409225	-	-	-	-	-	-	-	-	0.333086	-	-	-	-	-	-	-	-
serp	-	-	-	-	-	-0.361781	-	-	-	-	-	0.467263	-	0.489567	-	-	-	-	-0.531744	-
CG14830	0.288245	-	-	-	-	-	-	-	-	-	-	-	-	-	-	-	-	-0.204283	-	-
CG3434	0.167194	-	-	-	-	-	-	-	-	-	-	-	-	-	-	-	-	-	-	-
E(spl)mbeta-HLH	-	-	-	-	-	-	-	-	-	-	-	0.514523	-	-	-	-	-	-	-	-0.314283
Phf5a	-	-	-	-	-	-	-	-	-	-	-	-	-	0.206361	-	-	-	-	-	-
Jheh1	-	-	-	-	-	-	-	-	-	-	-	-	-	-	-	0.216799	-	-	-	-
net	-	-	-	-	-	-	-	-	0.221557	-	-	-	-	-	-	-	-	-	-	-
asRNA:CR45185	-	-	-	-	-	-	-	-	0.234918	-	-	-	-	-	-	-	-	-	-	-
Alh	-	-	-	-	-	-	-	-	-	-	-	0.244131	-	-	-	-	-	-	-	-
Tis11	-	-	-	-	-	-	-	-	-	0.248415	-	-	-	-	-	-	-	-	-	-
alphaTub84B	-	-	-	-	-	-	-	-	-	-	-	-	-	-	-	-	-	-	-	0.251361
CG10418	0.253601	-	-	-	-	-	-	-	-	-	-	-	-	-	-	-	-	-	-	-
pasi2	-	-	0.254205	-	-	-	-	-	-	-	-	-	-	-	-	-	-	-	-	-
spirit	-	-	-	-	-	-	-	-	-	-	-	-	-	-	-	0.254567	-	-	-	-
ci	-	-	-	-	-	-	-	-	-	-	-	-	-	0.263606	-	-	-	-	-	-
CG17549	-	-	-	-	-	-	-	-	-	-	-	-	-	-	-	0.268339	-	-	-	-
tacc	-	-	-	-	-	-	-	-	-	-	-	0.271345	-	-	-	-	-	-	-	-
Gtp-bp	-	-	-	-	-	-	-	-	-	-	-	-	-	-	-	-	-	-	-	0.276338
lncRNA:CR45550	-	-	-	-	-	-	-	-	-	-	-	-	-	0.27909	-	-	-	-	-	-
Gapdh2	-	-	-	-	-	0.283117	-	-	-	-	-	-	-	-	-	-	-	-	-	-
Ent2	-	-	-	-	-	-	-	-	-	-	-	-	-	-	-	-	0.290364	-	-	-
Khc	-	-	-	-	-	-	-	-	-	-	-	0.294749	-	-	-	-	-	-	-	-
Sod1	-	-	-	-	-	-	-	-	-	-	-	-	-	-	-	-	-	-	0.29588	-
Kr-h2	-	-	-	-	-	-	-	-	-	-	-	0.296108	-	-	-	-	-	-	-	-
Hnf4	-	-	-	-	-	-	-	-	-	-	-	-	-	-	-	0.296319	-	-	-	-
CG13751	-	-	-	0.310379	-	-	-	-	-	-	-	-	-	-	-	-	-	-	-	-
CG1273	-	-	-	-	-	-	-	-	-	-	-	0.315187	-	-	-	-	-	-	-	-
CG33993	0.323451	-	-	-	-	-	-	-	-	-	-	-	-	-	-	-	-	-	-	-
CG7414	-	-	-	-	-	-	-	-	-	-	-	-	-	-	-	-	0.323971	-	-	-
CG17776	-	-	-	-	-	-	-	-	-	-	-	-	-	-	0.324214	-	-	-	-	-
Glut1	-	-	-	-	-	-	-	-	-	-	-	-	-	-	-	0.33935	-	-	-	-
E(spl)m3-HLH	0.589113	-	-	-	-	-	-	-	-	-	-	-	-	-	-	-	-	-0.240485	-	-
Pdk1	-	-	-	-	-	-	-	-	-	-	-	0.350609	-	-	-	-	-	-	-	-
yip2	-	-	-	-	-	-	-	-	-	-	-	-	-	-	-	-	-	-	-	0.353947
Act5C	-	-	-	-	-	-	-	-	-	-	-	-	-	-	-	-	-	-	-	0.375404
Sec61beta	-	-	-	-	-	-	-	-	-	-	-	-	-	-	-	-	-	-	0.385618	-
CG30069	-	-	0.405181	-	-	-	-	-	-	-	-	-	-	-	-	-	-	-	-	-
myo	-	-	-	-	-	-	-	-	-	-	-	0.40776	-	-	-	-	-	-	-	-
CG32441	-	-	-	-	-	-	-	-	-	-	-	0.205265	0.203127	-	-	-	-	-	-	-
CG7924	-	-	-	-	-	-	-	-	-	0.411257	-	-	-	-	-	-	-	-	-	-
44075	-	-	-	-	-	-	-	-	-	-	-	-	-	-	-	-	-	-	-	0.416339
CG17977	-	-	-	-	-	-	-	-	-	0.188066	-	-	-	-	0.238617	-	-	-	-	-
bou	-	-	-	-	-	-	-	-	-	0.19841	-	-	0.229814	-	-	-	-	-	-	-
CG1103	-	-	-	0.223895	-	-	-	-	-	-	-	-	-	-	-	0.219203	-	-	-	-
CG42673	0.456954	-	-	-	-	-	-	-	-	-	-	-	-	-	-	-	-	-	-	-
sog	-	-	-	-	-	-	-	-	-	-	-	-	-	-	-	-	-	-	-	0.479426
Urm1	-	-	-	-	-	-	0.257695	-	-	-	-	-	-	-	-	-	-	-	0.222605	-
Vdup1	-	-	-	0.270671	-	0.2478	-	-	-	-	-	-	-	-	-	-	-	-	-	-
CG7720	-	-	-	-	-	-	-	-	-	-	-	-	-	-	0.220169	-	-	0.299124	-	-
capt	-	-	-	-	-	-	-	0.258469	-	-	-	-	-	-	-	-	-	-	-	0.271871
CG44242	-	-	-	0.230654	-	-	-	-	-	-	-	-	-	-	-	-	-	-	0.320649	-
Sh3beta	-	-	-	-	-	-	-	-	-	-	-	-	-	-	-	-	-	-	0.278142	0.281226
fax	-	-	0.239998	-	-	-	-	0.324831	-	-	-	-	-	-	-	-	-	-	-	-
sturkopf	-	-	-	-	-	-	-	-	-	-	-	-	-	-	-	-	0.297451	-	-	0.269339
CG5590	-	-	-	-	-	-	-	-	-	-	-	-	-	-	-	0.290152	-	-	0.280852	-
colt	-	-	-	-	-	-	-	-	-	-	-	-	-	-	-	0.304092	-	-	0.270424	-
arm	0.584698	-	-	-	-	-	-	-	-	-	-	-	-	-	-	-	-	-	-	-
cold	-	-	-	-	-	-	-	-	0.183009	0.209193	0.208818	-	-	-	-	-	-	-	-	-
hui	-	-0.230842	-	-	-	-	0.238864	-	-	-	-	-	-	-	-	0.601699	-	-	-	-
CG11550	-	0.201387	-	-	-	-	-	-	-	-	-	-	0.196683	-	0.218514	-	-	-	-	-
dally	-	-	-	-	-	-	-	-	-	0.262348	-	0.364882	-	-	-	-	-	-	-	-
CG13377	-	-	-	-	-	-	-	-	0.308036	-	-	0.324849	-	-	-	-	-	-	-	-
Oda	-	-	-	-	-	-	-	-	-	-	-	0.30982	-	-	-	0.328117	-	-	-	-
Stt3A	-	-	-	-	-	-	-	-	-	-	-	-	0.327858	-	-	-	0.311201	-	-	-
Smr	-	-	-	-	-	-	-	-	0.182419	-	0.255971	-	-	-	-	0.203998	-	-	-	-
CG31715	-	-	-	-	-	-	-	-	-	-	-	0.36696	-	-	-	-	-	-	-	0.294284
betaTub97EF	-	-	-	-	-	-	-	-	-	-	-	-	-	-	-	-	0.35611	0.308663	-	-
Past1	-	-	-	-	-	-	-	-	-	-	-	-	-	-	-	-	0.221756	-	-	0.458483
sinu	-	-	-	0.325499	-	-	-	-	-	-	0.357406	-	-	-	-	-	-	-	-	-
Cda4	-	-	-	-	0.180752	0.2232	-	0.254334	-	-	-	-	-	-	0.225495	-	-	-	-	-0.199375
CG16786	-	-	-	-	-	-	-	-	-	-	-	0.402203	-	-	-	0.311251	-	-	-	-
CG15546	-	0.238835	0.199449	-	-	-	0.285222	-	-	-	-	-	-	-	-	-	-	-	-	-
CHOp24	-	-	-	-	-	-	-	-	-	-	-	-	-	-	-	0.30859	-	-	0.42001	-
qsm	-	-	-	-	-	-	-	-	-	-	-	-	-	-	-	0.735214	-	-	-	-
ttk	-	-	-	-	-	-	-	-	-	-	-	0.737927	-	-	-	-	-	-	-	-
GstS1	-	-	-	-	-	-	-	0.447012	-	-	-	-	-	-	-	-	0.293556	-	-	-
Ubc6	-	-	-	-	-	-	-	0.232109	-	-	-	-	-	0.237465	-	-	-	-	-	0.273186
GCS2beta	-	-	-	0.188081	-	-	-	-	-	-	-	-	-	0.264395	-	-	0.295279	-	-	-
grp	-	-	0.232388	0.278792	-	-	-	-	-	-	-	-	-	-	-	-	-	-	0.252324	-
CG42238	-	-	0.281915	-	-	-	-	-	-	-	-	0.294889	-	-	-	0.198009	-	-	-	-
Tpi	-	-	-	-	-	0.318165	-	-	-	-	-	0.458314	-	-	-	-	-	-	-	-
grsm	0.231737	-	-	-	-	-	-	-	-	-	-	-	-	-	-	-	-	-	0.31103	0.250493
Nrt	-	-	-	0.454287	-	-	-	-	0.34745	-	-	-	-	-	-	-	-	-	-	-
Hmu	-	-	-	-	-	-	-	-	-	-	-	-	-	-	-	-	-	-	0.420383	0.390996
O-fut1	-	-	-	0.251636	-	-	-	0.308047	-	-	0.254191	-	-	-	-	-	-	-	-	-
disco-r	-	-	-	-	-	-	-	-	-	-	-	-	-	-	0.419687	-	-	0.434674	-	-
kuz	-	-	-	-	-	-	-	-	-	0.218775	0.235681	0.40801	-	-	-	-	-	-	-	-
cathD	0.201747	-	-	-	-	-	0.168676	-	-	-	-	-	0.239965	-	-	-	0.279779	-	-	-
CG13364	0.498793	-	0.393484	-	-	-	-	-	-	-	-	-	-	-	-	-	-	-	-	-
CG30423	-	-	-	-	-	-	-	0.175165	0.239544	-	-	-	-	-	-	-	-	-	0.281082	0.228669
CG1607	-	-	-	-	-	-	-	-	-	-	-	-	-	-	-	-	-	-	-	0.938487
NetA	-	-	-	0.251394	-	-	0.342435	-	0.36712	-	-	-	-	-	-	-	-	-	-	-
pip	-	0.367219	-	-	-	-	-	0.317845	0.278222	-	-	-	-	-	-	-	-	-	-	-
CG11999	-	-	-	-	-	-	-	-	-	-	0.229742	-	-	-	-	0.280377	0.168367	-	0.287224	-
CG11790	-	-	-	-	-	-	-	-	0.201277	-	-	-	0.248165	-	-	0.240162	0.29521	-	-	-
Tsp97E	-	-	-	-	-	-	-	0.259455	-	-	0.199773	-	-	-	-	-	0.329268	-	-	0.22663
UQCR-6.4	0.581265	-	-	-	-	-	-	-	-	-	-	-	-	-	-	-	-	-	0.445175	-
tsh	-	-	-	-	-	-	-	-	-	-	-	0.418166	0.153474	0.236671	-	-	-	-	-	0.23836
CG12384	-	-	-	-	-	0.209805	0.212472	0.187869	-	-	-	-	-	-	-	-	-	0.213924	-	0.231547
loj	-	-	-	-	-	-	-	0.2172	-	-	-	-	-	-	-	0.310451	-	-	0.313055	0.216742
CG32373	-	-	-	-	0.358454	0.337213	-	-	0.377042	-	-	-	-	-	-	-	-	-	-	-
CG3662	-	-	-	-	-	-	-	-	-	0.228022	-	0.379956	-	-	0.241574	0.232279	-	-	-	-
cib	0.325758	-	-	-	-	-	-	-	-	-	-	-	-	-	-	0.365509	-	-	-	0.392074
CG5854	-	-	-	0.243764	-	-	-	-	-	-	0.285085	-	-	-	-	-	0.166371	-	-	0.393282
Sec61gamma	-	-	-	-	-	-	-	-	-	-	-	-	-	-	-	0.327296	-	-	0.419935	0.355654
Fum1	-	-	0.268614	0.322043	-	-	0.260266	-	-	-	-	-	-	-	0.252991	-	-	-	-	-
SrpRbeta	-	-	-	-	-	0.218035	-	-	-	-	-	-	-	0.229247	-	0.404513	-	0.256479	-	-
CG17059	0.333585	-	-	0.245684	-	-	-	0.251299	-	-	-	-	0.282724	-	-	-	-	-	-	-
d4	-	-	-	-	-	0.271589	-	-	-	-	-	0.208564	-	-	0.230497	-	-	-	0.41082	-
Zip102B	-	-	-	-	0.229712	0.308513	-	-	0.295451	0.290375	-	-	-	-	-	-	-	-	-	-
eyg	-	-	-	-	-	-	0.420752	-	-	-	-	-	-	-	-	0.453022	0.25555	-	-	-
ct	0.269506	-	-	-	-	-	-	-	0.369528	-	-	0.506453	-	-	-	-	-	-	-	-
mamo	-	-	-	-	-	-	-	-	-	-	0.735311	-	0.686915	-	-	-	-	-	-0.26092	-
eya	-	-	-	-	-	-	-	-	-	-	-	-	-	-	-	-	-	-	0.629589	0.531933
CD98hc	-	-	-	-	-	-	-	-	-	-	-	-	-	-	-	-	-	-	0.342265	0.822005
twr	-	-	-	-	-	-	-	0.237478	-	-	-	-	0.232559	-	-	-	-	-	0.414967	0.281281
l(2)k05911	-	-	-	0.229254	-	-	0.552098	-	-	-	-	0.3864	-	-	-	-	-	-	-	-
CG9812	-	-	-	-	-	-	-	-	-	-	-	-	-	-	0.252704	0.379812	0.538728	-	-	-
RNASEK	-	-	-	-	-	0.367532	-	-	-	-	-	-	-	-	-	-	-	-	0.397202	0.422532
crok	-	-	-	0.278463	-	-	-	-	-	-	-	-	0.211326	0.248105	0.260387	-	-	-	0.218723	-
atl	-	-	-	-	-	-	-	-	-	-	-	0.478709	-	-	-	0.346978	-	-	-	0.392022
disco	-	-	-	-	-	-	-	-	-	-	-	-	-	-	0.677749	-	-	0.550853	-	-
eIF4A	-	-	-	-	-	-	0.296581	-	-	-	-	0.266793	-	-	-	0.263366	0.242433	0.187424	-	-
CG11137	-	0.210165	-	0.254202	-	-	-	-	-	-	-	0.350128	0.23489	-	-	0.207421	-	-	-	-
Spn27A	-	-	0.250014	0.225002	-	-	0.24114	-	-	-	-	-	-	-	-	0.30735	0.281561	-	-	-
Spase22-23	-	-	-	-	-	0.206335	-	-	-	-	-	-	-	-	0.263327	0.28632	-	-	0.297364	0.266509
Cht5	-	-	-	0.175196	-	0.262652	-	-	-	-	0.257151	-	-	-	-	0.166829	-	0.242595	-	0.225494
en	0.391948	0.288743	0.232224	-	-	-	0.428573	-	-	-	-	-	-	-	-	-	-	-	-	-
pen-2	-	-	-	-	-	0.274528	-	-	0.290313	0.214243	0.258925	-	-	-	-	-	-	-	0.331278	-
twz	-	-	-	-	-	-	-	-	-	-	-	-	-	-	-	-	-	0.493008	0.557229	0.319379
CG13887	-	-	-	0.247447	-	-	-	-	0.213496	-	0.230568	0.297623	-	0.220799	-	0.190924	-	-	-	-
CG33939	-	-	-	-	0.263143	0.271533	-	-	-	-	-	-	0.234152	-	-	-	-	-	0.304816	0.346735
wg	0.634538	-	-	-	-	-	-	-	-	-	-	0.59019	-	-	-	-	0.200634	-	-	-
CG5731	-	-	-	-	-	-	-	-	-	-	-	-	-	0.24531	0.334233	0.351641	0.219239	-	0.277922	-
mey	-	-	-	-	-	0.404009	-	-	-	-	-	1.03556	-	-	-	-	-	-	-	-
KdelR	-	-	-	0.210916	-	0.253637	-	-	-	0.169692	-	-	-	0.281712	-	0.277536	-	-	-	0.261178
Rm62	-	-	-	-	-	-	-	-	-	-	-	-	-	-	0.461606	0.484138	0.512801	-	-	-
CG33941	-	-	-	-	-	-	-	0.308263	0.3377	-	-	0.490079	-	-	-	0.383516	-	-	-	-
Pka-C3	-	-	-	-	0.190341	0.296581	0.224662	-	-	-	-	-	0.275895	-	0.238232	0.299413	-	-	-	-
fwe	-	-	-	0.217098	-	0.243573	-	0.310419	-	0.214165	-	0.282587	-	-	-	0.258637	-	-	-	-
Agpat3	-	0.220725	0.178497	-	-	0.252319	-	0.208314	-	0.255859	0.219967	-	-	-	-	0.234305	-	-	-	-
ced-6	-	-	-	-	-	-	-	0.339495	0.276844	-	-	0.376405	-	-	-	0.294407	-	-	-	0.317464
CG17272	-	-	0.27322	-	-	-	-	-	0.257066	-	-	0.350955	0.220243	0.232766	-	-	-	-	0.281767	-
Hexo1	-	0.26107	-	-	-	-	0.407917	0.352597	-	0.223361	-	-	-	-	-	0.376931	-	-	-	-
Jupiter	-	-	-	-	-	-	-	-	-	-	-	0.303322	0.296767	-	-	-	-	0.359712	-	0.66633
gus	0.465049	-	-	-	-	0.360602	-	-	-	-	0.400201	-	-	0.413414	-	-	-	-	-	-
CG33129	0.72512	-	-	-	-	0.162843	-	0.189845	-	-	-	-	-	-	-	-	-	-	0.563471	-
gish	-	-	-	-	0.185256	-	-	0.264966	-	-	-	0.474211	-	-	0.241623	-	0.267646	0.22674	-	-
Pdcd4	-	-	-	-	0.282395	0.346407	0.273135	-	-	-	-	-	-	-	-	0.188054	0.249459	-	-	0.347188
toe	-	-	-	-	-	-	0.536735	-	-	-	-	-	-	0.266566	-	0.553566	0.342489	-	-	-
Ten-a	-	-	-	-	-	-	-	0.359364	0.224176	-	-	0.371053	-	-	-	0.248377	-	-	0.517133	-
mnd	-	-	0.248101	-	-	0.206764	-	0.242345	0.278176	-	-	0.316598	0.223617	-	-	-	-	0.206429	-	-
CG3649	0.21332	-	0.21037	0.300002	-	-	0.448077	-	-	-	-	-	-	-	-	0.252932	0.307843	-	-	-
lqf	0.314193	-	-	-	-	-	-	0.333334	-	-	-	0.30576	-	0.26246	-	-	-	0.225015	-	0.297932
Trp1	0.390651	-	-	-	-	-	-	-	-	-	-	0.232318	-	0.215797	-	0.272848	0.295324	-	-	0.334706
Notum	-	-	-	-	-	0.296522	-	-	0.530482	-	0.425633	0.504672	-	-	-	-	-	-	-	-
CG32069	0.228701	0.247063	-	-	0.217868	-	-	-	-	0.274874	-	-	-	-	-	0.389314	-	-	-	0.408708
CG15212	-	-	-	-	-	-	-	0.313743	-	0.919855	-	0.385782	-	-	0.168368	-	-	-	-	-
Rab1	-	-	-	0.203054	-	0.242195	-	-	-	-	-	0.394891	-	0.27752	-	0.345305	-	-	0.347623	-
Ufm1	0.23773	-	-	-	-	-	-	-	0.228572	-	-	0.197996	0.248923	-	-	0.339419	-	-	0.227261	0.33419
CG43051	-	-	-	-	0.197042	0.259171	-	-	-	0.258744	0.395591	-	-	-	-	-	-	0.363453	-	0.382402
CG17883	-	-	-	0.312514	-	-	-	0.359671	-	0.341704	-	0.512928	-	-	-	0.342748	-	-	-	-
spz6	-	-	-	-	-	-	-	-	0.195105	-	-	0.309961	0.226663	-	0.408184	0.330167	-	-	0.40098	-
sun	0.362033	0.335904	-	-	-	-	-	-	-	-	0.266473	0.321131	0.278206	-	-	-	-	-	0.321948	-
CG6398	0.467093	-	0.392038	-	-	-	-	-	-	-	-	0.254169	-	0.436422	-	0.350524	-	-	-	-
CG42239	0.311022	-	0.327782	-	-	-	-	-	0.309702	-	-	-	-	-	0.26449	-	-	-	0.31261	0.374953
cdi	-	-	-	-	-	-	-	-	0.357899	0.305901	0.309973	0.364859	-	-	-	-	-	0.253036	-	0.317143
Ald1	-	-	-	-	-	0.271803	-	0.260283	-	-	-	0.588352	-	0.235084	-	0.315145	-	-	-	0.278997
CG42342	0.43538	-	-	-	-	-	-	-	0.44343	-	-	-	-	-	-	0.563945	0.511018	-	-	-
Fas2	-	-	-	-	-	-	-	-	-	0.340381	0.294571	0.572408	-	-	-	0.369597	-	-	-	0.378612
eca	-	-	-	-	-	-	-	-	-	0.213559	-	-	-	0.227528	0.23772	0.341539	0.232329	-	0.370962	0.346029
Pino	0.559629	0.236571	0.256932	-	-	-	0.205703	-	0.228673	-	-	-	-	0.266571	0.218357	-	-	-	-	-
sel	0.222622	-	-	-	-	-	-	-	0.169521	-	-	-	-	-	-	0.365175	0.22372	0.262995	0.450705	0.281155
udt	-	-	0.250437	0.247784	-	-	-	0.196914	-	0.212164	0.239827	-	-	-	0.264445	0.250778	0.319089	-	-	-
ERp60	-	-	-	-	-	-	-	0.289186	-	-	-	-	-	0.407847	0.286039	0.324831	0.366024	-	0.332909	-
ubl	-	-	0.274108	-	-	-	-	0.285151	0.256656	-	-	-	0.342145	-	0.326258	0.269398	-	-	0.262826	-
MESR3	0.468628	-	-	-	-	-	-	-	-	0.21348	-	0.509948	-	-	-	0.414135	0.414707	-	-	-
Pde9	-	-	-	-	-	0.292726	-	0.311331	-	-	0.220116	-	0.316071	-	-	-	-	0.370382	0.25772	0.296148
elB	-	-	-	-	0.195041	0.354296	-	0.311627	0.300227	0.406325	-	-	0.323225	-	-	0.181807	-	-	-	-
mthl5	-	0.24396	-	0.269347	-	0.236027	-	0.360812	-	-	0.274723	0.24374	-	-	0.247322	-	0.198509	-	-	-
miple2	-	-	-	0.188354	-	0.240668	-	0.232929	-	-	-	0.285086	-	0.230688	0.252905	0.279071	-	-	0.384934	-
Wnt2	0.959475	0.533333	0.349811	-	-	-	-	-	0.272686	-	-	-	-	-	-	-	-	-	-	-
noc	-	-	-	-	-	0.435329	-	-	0.379833	0.397883	-	-	-	-	-	0.248351	0.297812	0.361032	-	-
zetaCOP	-	-	-	-	-	0.28737	-	-	-	-	-	-	0.243892	0.274689	-	0.350887	-	0.313934	0.343915	0.327036
CG9331	-	-	-	-	-	-	-	0.33363	-	0.202662	-	0.23577	-	-	0.282413	0.446891	0.383545	-	-	0.267098
CG10005	-	-	0.227257	-	-	0.257003	-	-	0.390423	-	-	-	0.283583	0.281946	0.239606	0.183546	-	-	0.314685	-
CG13082	-	-	-	0.448004	0.564586	0.607974	-	-	-	0.565072	-	-	-	-	-	-	-	-	-	-
CG14439	-	-	-	-	-	0.222947	-	-	0.320103	0.247914	-	-	-	0.366378	0.223399	0.333443	0.21329	-	0.263029	-
grh	-	-	0.207482	-	-	-	-	0.267441	0.305192	-	-	-	-	-	0.26092	0.182805	0.316674	0.278943	0.383414	-
CG10960	-	-	-	0.283049	-	-	-	-	-	0.457576	-	-	-	-	0.334566	0.44011	-	0.428389	0.261249	-
grnd	-	-	-	0.35567	-	-	-	0.295437	-	0.260048	0.296469	0.225354	-	-	-	0.278726	-	0.259904	-	0.245198
CG9312	-	-	-	-	-	-	-	-	-	-	-	-	-	-	0.27546	0.799944	0.483439	0.45094	0.208325	-
mrva	0.320487	-	-	0.183754	-	-	0.160562	-	0.307334	0.230629	-	0.394491	-	-	-	-	0.333976	-	0.296052	-
Crk	-	-	-	-	-	-	-	-	-	0.465102	-	-	0.439275	-	0.423557	0.47616	-	-	-	0.436498
ImpL2	-	-	-	-	-	-	-	-	0.391978	1.267	-	0.311207	-	-	-	-	-	-	-	0.280303
obst-A	-	0.465812	0.502302	-	-	-	0.34475	0.939855	-	-	-	-	-	-	-	-	-	-	-	-
CG40160	-	-	-	0.341656	0.20791	-	-	-	-	-	-	0.43169	-	0.304074	0.239882	0.306766	-	-	-	0.437143
bai	-	-	0.216814	-	-	-	-	0.255442	-	0.231104	-	-	-	0.310714	-	0.310095	0.363868	0.25292	0.331904	-
Dtg	0.389932	-	-	-	0.242449	0.35917	-	-	0.449517	-	-	0.275463	-	-	-	0.310535	0.250422	-	-	-
CG1161	0.203899	-	-	-	-	-	-	-	0.303168	0.180633	0.262813	-	0.220231	-	0.250721	0.211482	0.218622	0.222243	-	0.210094
26-29-p	-	-	-	-	-	0.254558	-	0.470639	0.303348	0.180297	-	-	-	-	-	0.399595	0.386208	0.290005	-	-
bi	-	-	-	-	-	-	-	-	-	0.549305	0.371296	0.601218	0.939175	-0.171752	-	-	-	-	-	-
CG11275	0.262798	-	0.350565	0.339242	0.307567	-	0.359366	-	-	-	-	-	-	-	-	-	0.246536	-	0.441423	-
CG43658	0.639632	-	-	-	-	-	-	0.371193	0.428229	0.42382	0.210809	-	0.239115	-	-	-	-	-	-	-
l(1)G0320	-	-	-	-	-	0.325794	-	-	-	-	-	0.321824	-	0.296669	0.244067	0.396685	-	-	0.466756	0.276159
CG4612	-	0.182391	0.21615	0.341856	0.232953	0.228525	-	0.234475	-	-	0.234139	-	-	0.269284	-	-	0.242127	-	-	0.210781
Cnx99A	0.418074	-	-	0.29301	-	-	-	-	-	0.21429	-	0.247967	0.277403	0.337997	0.302988	-	0.315015	-	-	-
msi	-	-	-	0.381473	-	-	0.36634	-	-	-	0.462049	-	-	-	-	0.307941	-	0.44188	-	0.4737
modSP	-	0.210101	-	-	-	0.213664	0.261686	-	0.31061	-	0.23348	0.384053	0.278946	-	-	0.270096	-	-	0.304565	-
CG3842	0.199353	-	-	-	-	0.214989	0.208611	-	0.249831	-	-	0.293417	-	0.27804	0.281281	0.283276	-	-	0.480171	-
Mkp3	-	0.232207	0.521263	0.226663	0.326161	0.209694	-	0.297523	-	0.187443	0.253443	-	-	-	-	-	-	0.236287	-	-
CG12213	-	-	-	0.244451	-	-	-	0.260314	-	0.160035	0.191913	-	-	0.324159	0.265238	0.218173	0.220998	0.331097	0.279927	-
Gnpnat	-	0.192295	-	-	-	0.170056	0.249694	0.252518	-	-	-	-	-	-	0.233821	0.283184	0.325612	0.251104	0.26762	0.323716
hh	0.466983	0.155122	-	-	-	0.239542	0.373188	0.368773	-	-	0.286356	-	0.364955	-	-	-	-	0.300651	-	-
frm	-	-	-	-	-	-	-	-	-	-	-	1.8306	-	-	-	-	-	-	0.734953	-
l(3)neo38	-	-	-	-	-	-	-	0.21407	-	0.1809	0.283871	0.525253	0.214319	-	-	0.209706	0.322669	-	0.35487	0.317588
CG43759	-	-	0.322727	0.314883	0.286864	0.249797	0.221122	0.273761	0.279451	0.374734	-	0.331022	-	-	-	-	-	-	-	-
mRpL33	0.256044	-	-	0.306604	-	-	-	-	0.283163	0.280336	0.30558	-	0.313749	0.226412	-	-	-	0.343605	0.363163	-
ems	-	-	-	-	-	0.250947	-	-	0.653341	0.300993	-	0.371081	-	0.570807	-	-	-	-	0.406987	0.188591
Idh	-	0.308712	-	0.332467	-	0.246911	0.326418	0.309504	-	-	-	-	-	-	0.208682	0.319144	0.253835	0.24701	0.214867	-
lbk	-	-	-	-	-	0.215023	-	0.430757	0.373398	0.236514	0.233342	0.32114	-	0.429085	-	0.295585	-	-	0.313956	-
CG11882	0.462952	0.292658	0.250916	-	-	-	-	-	0.215497	-	-	-	-	-	0.284803	0.269539	0.380048	0.300179	0.164832	0.246139
UQCR-11	0.398013	-	-	-	-	0.403185	-	0.456661	-	0.393916	-	-	0.421136	0.355823	-	-	-	-	0.447953	-
Tapdelta	0.241998	-	0.195037	-	-	0.295102	-	0.237641	0.225597	0.187913	0.177921	-	-	0.280552	-	0.382386	-	-	0.387069	0.286803
CG17032	-	-	0.31747	0.253577	-	0.412836	-	0.652679	-	0.345175	0.404362	-	0.324196	0.253942	-	-	-	-	-	-
fz	0.286034	-	0.296739	0.273188	0.24242	0.257762	-	0.211647	-	-	-	0.740349	-	-	-	0.390926	0.266134	-	-	-
Dll	-	0.420109	-	-	-	-	0.568987	0.337147	0.733884	-	-	0.661236	0.265705	-	-	-	-	-	-	-
fok	-	-	-	0.250236	-	0.340635	-	-	0.383011	-	0.312508	0.256747	0.280212	-	-	-	0.189267	-	0.440976	0.552676
CG11069	-	-	-	-	-	0.330209	0.245921	0.299894	-	-	0.277606	-	-	0.334174	0.26929	0.316102	0.305068	-	0.365033	0.318254
Dad1	-	-	0.25728	-	-	0.256519	-	-	0.326698	0.204006	0.239327	-	0.239577	-	-	0.26358	0.26304	0.325377	0.361948	0.330191
Xbp1	-	-	0.44267	0.255953	-	0.405636	-	-	0.355418	-	-	-	-	-	-	0.472251	0.403528	0.296138	0.460682	-
mab-21	-	-	-	-	-	-	-	-	-	0.459253	0.555882	0.515466	0.442404	-	0.505324	-	-	-	0.622003	-
Kal1	0.885079	0.261729	-	0.39433	-	-	0.530393	0.442989	-	0.181325	0.354304	-	-	-	-0.352765	-	-	-	-	0.440337
Cln7	-	-	0.24404	-	-	0.251651	0.237768	0.333344	0.253568	0.26203	-	0.327505	0.278404	-	-	-	0.21269	0.215717	0.320682	0.240598
CG33303	0.339219	-	-	0.237216	-	-	-	0.305559	-	-	0.245534	-	0.256241	0.301709	-	0.355616	0.290455	0.26581	0.315335	0.292305
RpL39	-	0.63495	0.653361	-	-	0.649227	0.647769	-	-	-	-	-	-	-	-	0.668711	-	-	-	-
CG17754	-	-	-	0.343219	-	-	-	0.367791	0.308441	0.377558	0.419121	0.475924	0.390119	-	-	0.343002	-	0.270362	-	-
Maf1	-	-	0.377121	-	-	-	-	0.41576	0.365492	-	-	0.39306	0.370131	-	-	-	0.305919	0.394851	0.342359	0.351734
CG2493	-	-	-	-	0.20832	0.240038	0.282873	0.323766	0.31617	0.237896	0.244555	-	0.233474	0.205075	0.236013	0.288764	-	0.247334	0.262286	-
mth	-	-	-	0.208764	0.24377	0.285069	0.320634	-	0.232395	0.357501	0.249933	0.41057	0.258412	-	0.291128	0.242271	0.296042	-	-	-
obst-B	1.39208	-	-	0.403479	-	0.191499	0.510885	-	0.186872	-	-	0.720587	-	-	-	-	-	-	-	-
Cht2	0.447139	-	-	0.351747	-	0.297272	0.343188	0.30704	0.263603	0.261138	-	0.448842	-	-	-	0.252592	0.45343	-	-	-
kune	0.27526	-	-	0.271181	0.286837	0.274397	-	0.308917	0.213738	0.295066	0.25275	0.218591	-	-	0.226305	0.267634	0.326748	-	-	0.248332
Gp93	-	-	0.393937	-	-	-	-	-	0.341486	-	-	-	-	0.465321	-	0.56666	0.472937	-	0.666648	0.560336
GstO3	-	-	-	0.301324	0.318656	-	0.400611	-	0.559285	0.338317	0.258081	-	-	-	-	0.424096	0.319951	-	0.550381	-
CG33169	0.203386	-	0.294388	-	0.319426	-	0.2541	0.324513	-	-	-	-	0.243064	0.307885	-	-	0.443242	0.333212	0.484411	0.298415
CG5390	-	-	-	-	-	0.257884	0.227384	0.422018	0.273521	0.323379	0.217774	0.317167	0.224554	-	0.262009	0.343708	0.228525	0.256696	0.263321	-
Arl4	0.3914	0.30965	0.2908	-	0.26897	-	-	0.405029	0.323832	-	0.367428	-	-	-	0.316879	0.331477	-	0.365731	-	0.308001
Ugt302K1	0.254965	0.376869	0.320926	0.450987	0.229654	0.28995	0.298211	-	0.479684	-	-	0.410353	0.309999	-	-	-	-	-	0.304039	-
Spase25	0.3181	-	0.22091	-	-	0.25982	-	0.290629	0.221	0.216221	0.23451	-	-	0.257327	0.289198	0.337433	0.264426	0.209248	0.311349	0.321227
luna	0.354121	0.305386	0.352844	0.433865	-	0.344058	-	0.360518	-	0.398176	0.30366	-	0.319675	-	0.269568	0.339527	-	-	-	-
lncRNA:CR31044	-	-	-	-	0.312253	0.406909	-	-	-	0.393059	0.453599	0.532065	0.511021	-	0.374131	0.371394	-	0.305568	-	0.234325
Had1	0.377513	0.449898	0.247763	0.423135	0.228673	-	0.423416	0.325507	0.396407	-	-	0.364124	-	-	-	0.184819	-	-	0.275359	0.209692
E2f1	0.211168	-	-	0.256536	0.232396	0.390611	0.29439	-	0.33979	0.300019	0.437671	0.456039	0.397835	-	-	0.350953	0.292147	-	-	-
Cpr78E	-	0.683051	1.08602	-	0.635768	0.785121	-	-	-	0.567534	-	-	-	-	-	0.209805	-	-	-	-
mirr	-	-	-	-	-	-	-	0.534537	-	0.205119	-	-	0.378038	0.657004	0.391713	0.45535	0.37016	0.548318	0.458506	-
CG40178	0.362049	-	-	-	0.306221	0.446487	-	-	-	0.406187	-	0.531379	-	0.356606	-	0.45635	0.319057	0.454449	-	0.392301
vvl	-	0.358237	0.569849	0.571804	0.332065	0.422604	-	0.697562	-	0.488823	-	-0.347138	0.441517	-	0.521471	-	-	-	-	-
Sec23	-	-	0.372472	-	0.397267	0.374029	-	0.413804	-	0.406861	0.380832	-	-	0.381585	-	0.506019	0.412047	-	0.488686	-
Ost48	-	-	0.232478	-	0.331955	0.263282	0.260942	0.344615	0.312417	0.275045	0.249718	-	-	0.30998	0.329295	0.413262	0.342299	-	0.470817	-
CG6770	0.257842	-	-	-	-	-	-	-	-	-	0.283746	0.518039	0.321419	-	0.505015	0.8743	-	-	0.770979	0.630697
Catsup	0.221731	-	-	0.262112	0.264287	0.32509	0.250983	0.285454	-	0.230952	0.270774	-	-	0.283256	0.291212	0.363341	0.233131	0.207762	0.403297	0.275843
CG9416	-	-	-	-	-	-	0.424201	0.458752	0.494861	0.492448	0.361192	0.735998	0.364052	-	-	0.405309	-	-	0.447187	-
CG4928	-	-	-	-	-	-	-	-	0.232698	0.297	0.345435	0.491565	0.461205	0.292125	0.440054	0.522043	0.309124	0.444402	-	0.356848
CG11438	-	0.255217	0.348128	0.339672	0.285263	0.32325	0.333079	0.304849	-	0.277783	-	0.417067	-	0.308207	0.234585	0.308112	-	-	0.481094	-
MFS14	-	0.413032	0.466733	0.446924	0.415792	0.576811	0.3649	0.458415	0.209213	0.352304	-	-	-	-	0.296987	-	-	-	-	0.215369
CG13064	-	-	-	-	-	-	-	0.351452	0.189825	0.396863	0.253793	1.2446	0.492446	0.515607	-	-	-	0.296687	0.498464	-
pcs	0.383255	-	-	0.362053	0.333501	0.4268	-	-	-	0.396832	-	0.458351	0.512958	-	-	-	-	0.41846	0.594802	0.393201
CG32982	0.241491	0.394463	0.351251	0.447009	0.399352	0.481312	-	0.431511	0.411976	0.386543	0.321963	-	0.431972	-	-	-	-	-	-	-
Hr78	-	-	0.31154	0.344728	0.32063	-	0.269705	-	-	0.342779	-	0.509149	-	0.316396	0.325726	0.381839	0.325679	-	0.476485	0.381998
CG15168	0.290149	-	-	0.26002	-	-	-	-	0.312893	0.350536	0.365508	0.357801	0.247706	0.241241	0.321539	0.251005	0.239768	0.27703	0.430904	0.402907
emc	-	-	0.286772	-	-	0.394347	-	0.356437	-	0.340783	0.831642	0.584982	-	0.590731	-	-	-	0.584631	-	0.380596
Mnn1	-	0.203115	0.202697	0.348843	0.247657	0.233785	0.259987	0.301254	0.286842	0.292175	0.309901	0.302051	0.279512	0.319259	-	0.275898	0.273309	0.214866	-	-
CG42394	0.734429	-	-	-	-	-	-	0.746361	-	-	-	0.67343	0.575979	-	0.468272	0.590154	0.580173	-	-	-
Stt3B	-	-	-	0.315267	0.30719	-	0.303529	0.3964	0.291059	0.296624	0.238443	-	-	0.365896	-	0.358596	0.379686	0.346862	0.426373	0.3575
Manf	0.291393	-	0.253294	0.237757	-	-	-	-	0.329369	0.236071	0.241451	0.386183	0.280445	0.344018	0.357422	0.327451	0.312073	-	0.404599	0.408509
Spp	0.338436	-	0.355747	0.291268	-	0.379743	-	-	-	0.279202	0.325829	-	-	0.337612	0.369671	0.402976	0.452103	-	0.469068	0.40924
CG10359	-	-	-	0.267089	0.317657	0.364877	-	-	-	0.269172	-	0.601317	0.381621	-	0.290212	0.461881	0.272061	0.390124	0.465752	0.39328
hth	-	-	-	-	0.60387	0.713719	-	-	-	0.552422	0.538823	0.635126	0.42702	-	0.359324	-	-	-	0.33345	0.311635
Fas3	-	-	-	0.310815	0.388388	0.331548	-	0.476635	-	0.308037	0.410965	-	0.426593	0.268424	0.351439	-	0.307813	-	0.435775	0.488979
sbb	-	0.277172	-	-	-	-	-	0.413976	0.271745	0.469126	0.461724	0.531196	0.407682	0.326173	0.321268	0.322362	-	0.440593	0.298681	-
CG4455	-	-	0.353633	0.440783	-	0.427471	0.392092	0.425235	-	0.411079	-	0.512426	-	-	0.342177	0.387461	-	-	0.432155	0.424465
CG9427	0.450147	0.423252	0.499775	0.724996	0.544325	0.530587	0.350991	0.440998	-	0.386403	-	-	-	-	-	-	0.256795	-	-	-
CG8031	-	-	0.302717	0.410987	0.202082	-	0.319821	0.32744	0.205879	0.285429	0.224149	0.293911	0.230594	0.274558	0.266007	0.329217	-	0.293536	0.283069	0.359444
CG11486	-	0.249268	-	0.233849	-	0.318015	0.299564	0.410185	0.403734	0.339886	0.365275	0.313216	-	0.429909	0.32798	0.361128	0.337335	0.277959	-	-
Blimp-1	0.60549	-	-	-	0.500187	0.658097	0.540143	-	0.692488	0.60285	-	0.575285	-	-	-	0.516943	-	-	-	-
HSPC300	0.319598	0.26834	-	-	0.275535	-	0.325187	0.386554	0.327157	0.367018	0.297414	0.47289	0.409923	-	-	0.291399	0.294528	-	0.347613	0.356399
CG32276	0.328793	-	0.245903	0.252874	0.266484	0.351314	-	0.290172	-	0.251598	-	0.171528	0.242699	0.331961	0.283932	0.370297	0.300866	0.335017	0.349847	0.391916
Sf3b5	0.407932	0.353798	0.346075	-	0.315551	-	0.288886	-	0.30591	0.391592	0.377994	-	0.335905	0.358161	0.340511	-	-	0.376772	0.326361	0.352032
Lamp1	-	-	0.267763	-	0.275901	0.379665	0.354794	0.446026	0.322307	0.313091	-	0.462434	-	0.272038	0.296696	0.407878	0.240193	0.274912	0.295626	0.336077
Eip75B	-	0.340542	-	-	0.345367	0.358645	-	0.355708	-	0.440025	0.379932	0.62639	0.420424	-	0.384965	-	-	0.353136	0.471198	0.469383
shf	0.765458	0.326787	-	0.463788	0.389728	0.29993	0.400996	0.238849	-	-	-	0.581238	-	0.428003	-	0.357427	0.334631	-	0.359493	-
CG5885	-	-	0.302815	0.245123	-	0.434169	-	-	-	0.294752	0.283123	0.18872	0.357304	0.424252	0.354651	0.442626	0.336104	0.36776	0.560096	0.44048
CG14301	-	0.443422	0.593868	0.702605	0.508856	-	0.360473	-	0.395576	0.291266	0.243233	-	-	-	-	-	-	0.552139	0.94244	-
CrebA	-	0.205535	0.258742	-	0.350362	0.401511	0.202409	-	0.286496	0.3108	0.33064	-	0.390463	0.369984	0.3991	0.527539	0.327286	-	0.349464	0.369408
Sb	-	0.285795	0.338987	-	-	-	-	0.419038	0.539374	-	-	0.945939	0.272288	0.718799	0.389225	0.785385	0.404741	-	-	-
Inx3	-	-	0.240426	0.340697	-	0.412258	0.286637	0.41399	0.271266	0.396856	0.407158	-	0.361265	-	0.382518	0.381843	-	0.381569	0.437904	0.398172
CBP	0.37908	0.313112	0.325534	-	-	0.330975	0.371476	-	-	0.31195	0.341443	0.357782	-	0.257684	0.32883	0.398868	0.246974	0.389148	0.421672	0.355236
magu	0.515217	-	-	0.450157	-	-	0.406277	-	0.585187	-	0.422441	0.64	-	-	0.362964	0.954006	0.826912	-	-	-
nkd	-	-	-	-	-	0.46455	0.374389	0.368239	0.648138	0.437576	0.653733	0.71842	0.59883	-	0.495046	0.42917	-	-	-	-
Spn77Ba	-	0.270463	0.392685	0.407894	0.429004	0.501896	0.491722	0.473104	0.46227	0.350555	-	0.30598	-	0.291123	-	0.348173	0.305774	-	-	0.265766
CG9691	0.393161	0.414284	0.406561	-	-	-	-	0.749317	0.51927	0.514974	-	-	0.537213	-	0.42978	0.480151	0.450799	-	-	0.423585
MSBP	0.384543	0.219113	0.296892	0.274363	0.266943	0.382068	0.370973	0.309901	0.23008	0.32362	0.308037	-	0.2646	0.342271	0.329198	0.327416	-	0.25177	0.271439	0.326391
CaBP1	-	0.275394	0.304456	0.308057	0.270808	0.239258	0.26763	0.263379	0.304493	0.235689	-	-	0.282282	0.410404	0.342034	0.513267	0.351417	0.246903	0.436267	0.428161
ergic53	-	0.296984	0.349986	-	0.303415	-	0.289665	0.286932	0.277824	0.262495	-	0.355926	0.347289	0.345491	0.331517	0.467639	0.322462	0.292887	0.518592	0.437743
mav	-	-	0.342313	0.250635	0.336093	0.414561	0.385631	-	0.368224	0.30827	0.305575	0.470741	0.291378	0.308582	0.338458	0.388049	0.235043	0.317909	0.447522	-
Tom7	-	-	0.43532	0.466912	0.43108	0.42519	0.395443	0.405539	0.38923	-	0.41552	0.325167	0.457641	0.400364	-	0.389791	-	0.377001	0.472748	-
robo2	0.306897	-	-	-	0.409075	-	-	-	0.270529	0.514599	0.697354	1.00652	0.352826	0.282148	-	0.663078	-	0.471781	0.347397	0.545423
OstDelta	0.388058	0.236395	0.296607	-	0.337522	-	0.367087	0.42962	0.31357	0.309731	0.342977	0.224536	0.282385	0.416481	0.448472	0.504558	0.446633	0.335443	-	0.372441
cindr	0.23477	0.256318	0.338802	0.271557	0.296545	0.417875	0.26705	0.370291	0.333335	0.330447	0.315733	0.326241	0.285033	0.332641	0.39128	0.37458	-	0.358162	0.219857	0.336567
hid	-	0.216644	0.328421	0.420846	0.398387	0.463524	0.468338	0.542328	0.549924	0.400555	0.414459	0.399807	0.383749	-	0.332777	0.423504	0.374248	-	-	-
CG11905	0.345553	0.297363	0.299303	-	0.385806	0.459721	0.245061	0.646214	0.543654	0.84103	-	0.368	0.381531	0.419045	-	0.466405	0.430688	-	-	-
klu	0.714524	0.243453	0.250587	0.44533	0.41732	0.532677	0.317228	-	0.303511	0.409979	0.256665	0.589193	0.357974	-	0.299064	0.570737	0.427188	-	-	-
lft	0.441879	-	0.381939	0.413452	0.362902	0.433097	0.389524	0.491758	0.336493	-	-	0.524414	0.367405	-	0.372129	0.47014	0.316386	-	0.472652	0.422239
Fkbp14	0.450345	0.262235	0.413353	0.273013	-	0.306356	-	0.329328	0.36172	0.251533	0.305577	0.352249	0.355337	0.365671	0.375024	0.474758	0.290331	0.31439	0.465897	0.310416
CG12880	-	-	-	0.601854	0.636765	0.852965	-	0.440057	-	0.543533	0.365594	-	0.334284	0.480813	0.400227	-	0.33154	0.66637	-	0.67773
TRAM	0.357409	-	0.296144	0.279162	0.320353	0.44377	-	0.360545	0.362464	0.35191	0.312381	-	-	0.425204	0.496418	0.558798	0.373027	0.304972	0.621139	0.476459
CG7637	0.429451	0.383737	0.447444	0.481133	0.387781	0.400336	0.405552	-	0.480212	0.383401	0.320875	-	0.372971	0.418148	0.370785	0.323651	0.330041	0.4159	-	-
pdgy	-	-	0.361819	-	0.218096	0.371818	0.301649	0.389394	0.279761	0.292878	0.37076	0.400226	0.318474	0.346931	0.415119	0.496479	0.305811	0.475658	0.483398	0.572375
Calr	0.338422	0.254705	0.344865	0.333006	0.312931	0.287075	-	0.295748	0.314766	0.298707	0.328082	0.356215	-	0.485699	0.433707	0.61935	0.48128	-	0.520393	0.421
lncRNA:CR44811	-	0.616642	0.628561	0.757516	0.517811	0.486	0.369469	0.846432	0.626122	0.612451	0.481745	-	0.518795	-	-	-	-	-	-	-
Spase12	0.327909	0.286643	0.286768	0.285928	0.280099	0.335318	-	0.353882	0.330225	0.302565	0.271522	0.37291	0.388802	0.420094	0.347817	0.43215	0.323381	0.351424	0.494153	0.432323
Ostgamma	0.388114	0.290017	0.343873	0.376017	0.341679	0.3384	0.26784	0.398883	0.245007	0.288208	0.291525	-	0.328526	0.449218	0.326379	0.461154	0.394563	0.32995	0.435686	0.428181
alt	0.579149	-	0.416866	0.408665	0.446316	0.600669	0.453714	0.540971	0.477606	0.445212	0.361902	-	-	-	-	0.490167	-	0.476924	0.598426	0.532923
Inx2	0.337241	0.389334	0.383317	0.270479	-	-	0.299583	0.383288	0.383233	0.411602	0.364577	0.489505	0.366783	0.34658	0.374213	0.458328	0.35997	0.376459	0.484473	0.369229
salm	-	0.495128	0.4944	-	0.384786	0.402491	-	0.719463	0.654935	0.57686	0.545354	0.700613	0.789913	0.565451	0.572961	-	-	-	-	-
CG8860	-	0.386569	0.338369	0.427514	0.41302	0.462345	0.396542	-	-	0.407199	0.357154	0.395586	0.41043	0.44525	0.453931	-	0.372677	0.46134	0.683526	0.55035
Hsc70-3	-	-	-	-	-	-	-	0.531615	0.552562	-	-	0.606853	-	0.657167	0.719234	1.0078	0.775267	0.622103	0.824028	0.701708
SP1029	-	-	-	-	-	-	-	-	-	0.826928	0.326656	0.879549	0.858602	0.717517	1.13733	1.04712	0.609713	0.598839	-	-
Msr-110	-	0.634059	0.860255	0.932755	0.695256	0.864588	-	0.712081	0.299202	0.409403	-	-	0.486393	-	0.616806	0.553514	-	-	-	-
Rtnl1	-	0.325422	0.33137	0.326371	0.460092	0.391563	0.319962	0.425012	0.38299	0.356976	-	-	0.427153	0.413954	0.385059	0.52588	0.615639	0.45673	0.537317	0.464712
glec	0.997769	0.32431	0.30637	0.621078	-	0.494151	0.524026	0.386567	0.455991	0.45912	0.540346	0.344266	0.38075	-	0.37295	0.352419	0.281443	0.345589	-	-
CG33774	0.43839	0.286534	0.342243	0.378688	0.303871	0.504026	0.342891	0.348794	0.357009	0.319107	0.331915	-	0.397294	0.392793	0.346169	0.418044	0.379876	0.34757	0.464798	0.487197
CG5758	0.468465	0.451564	0.433577	-	0.338439	0.454172	0.312597	0.908048	0.902993	1.0516	0.859259	0.313673	0.752518	-	-	-	-	-	-	-
GNBP3	0.415344	-	0.371358	0.513649	0.405741	0.561965	0.562429	0.629161	0.656234	0.50212	0.356552	-	0.34725	-	0.457216	0.548431	0.403244	-	0.329701	0.248764
Syp	-	-	-	0.378801	0.423396	0.439138	0.365842	0.544668	0.395539	0.399884	0.404736	0.512961	0.42472	0.357328	0.435996	0.439072	0.397059	0.484962	0.375468	0.547952
Nep2	0.596119	-	-	-	0.193591	0.26492	0.259342	0.43052	0.462781	0.480512	-	0.779182	0.462266	0.368608	0.376713	0.563809	0.493148	0.419779	0.817008	0.446855
Acbp1	0.438623	0.352184	0.473818	0.351166	0.455319	0.452572	0.318188	0.42557	0.358871	0.307042	0.363394	-	0.379886	0.5217	0.325418	0.432166	0.398154	0.327671	0.393699	0.488454
CG15282	-	0.322617	0.627291	0.372405	1.26482	1.45264	0.30031	-	-	1.20895	-	-	-	-	1.03652	0.286052	0.482657	0.21491	-	-
Sans	0.419637	0.293266	0.383579	0.312096	0.332675	0.454894	0.395424	0.380251	0.543199	0.44828	0.372166	0.618656	0.376089	0.426432	0.300323	0.352419	0.259683	0.488165	0.415854	-
CG32447	0.344964	-	0.270981	0.30075	0.26226	-	-	0.650095	-	0.581391	0.618434	0.809681	0.654701	0.810041	0.450028	-	-	0.785134	0.578358	0.463675
CG17271	0.389956	0.320942	0.374893	-	0.463658	0.418262	0.308135	-	0.455202	0.402883	0.404524	0.396618	0.369419	0.468157	0.429936	0.555678	0.584667	0.356631	0.522958	0.367313
pum	-	0.310989	0.291906	0.352324	0.359017	0.502758	0.398956	0.573944	0.579244	0.522692	0.337892	-	0.403938	0.329237	0.520829	0.64076	0.334913	0.354952	0.458028	0.332795
Hsp23	-	0.607566	0.474684	-	-	-	0.829291	-	0.766348	0.612766	0.470589	0.921987	0.555802	-	0.557496	0.755551	0.771956	-	-	0.319751
CG31075	0.358628	0.353784	0.494029	0.333537	0.411661	0.513134	0.563244	0.467869	0.407727	0.382257	0.344526	0.290123	0.31054	0.418239	0.282288	0.61576	0.337959	0.398152	-	0.368233
CG4914	0.500579	0.372518	0.310433	0.321585	-	0.318269	0.36671	0.56149	-	0.799465	-	0.834067	0.461722	-	0.344941	1.05609	0.758812	0.388639	0.371436	-
CG14257	0.594086	0.404553	0.358206	0.374495	0.33368	0.540301	0.639093	0.585209	0.803752	0.233088	-	-	0.528815	0.44277	0.582219	0.837658	0.434259	0.159215	-	-
Lac	0.563164	0.376788	0.429026	0.527749	0.403567	0.400192	0.433061	0.56663	0.371285	0.442817	0.421448	-	0.33661	0.424008	0.360026	0.576751	0.548949	-	0.336678	0.396431
CG9689	0.361923	0.369261	0.390794	0.505841	0.383334	0.647686	0.317259	0.676357	0.44152	0.578098	-	-	0.69228	-	0.559028	0.718844	0.46354	0.50399	-	0.319534
Hsp67Ba	-	0.838976	0.728442	0.734416	0.864019	0.80146	0.963589	0.993037	0.606037	0.73575	-	0.531697	-	-	-	-	-	-	0.514971	-
CG17672	0.724663	0.452129	0.457567	0.35201	0.323061	0.559556	0.446179	0.609264	0.285677	0.462174	0.479805	-	0.344067	0.395564	0.466754	0.397437	0.303828	0.436878	0.399919	0.451129
CG33977	0.528809	0.364666	0.407719	0.457373	0.44743	0.477194	-	0.471579	0.458842	0.463848	0.432894	0.467275	0.438152	0.479188	0.475301	0.549163	-	0.419566	0.525545	0.532295
Tom	0.289238	0.277375	0.343195	0.299936	0.250603	0.332854	0.254899	0.495369	0.398798	0.578767	0.509634	-	0.569434	0.580164	0.367454	0.534889	0.477827	0.450565	0.742616	0.685596
NijA	0.402058	0.343193	0.378492	0.460844	0.547561	0.710549	0.562161	0.440264	0.38432	0.391019	0.381677	0.485836	0.409978	0.552315	0.504132	0.40332	0.410137	0.243564	-	0.444306
br	0.387195	0.320539	0.408341	0.359624	-	0.502557	0.531468	0.590426	0.56042	0.620479	0.481022	0.652222	0.556897	0.465898	-	0.547732	-	0.518594	0.522379	0.469679
tna	0.353904	0.309	0.279059	0.533038	0.410328	0.521576	0.483141	0.532087	0.587803	0.551705	0.215953	0.950989	0.375652	0.332901	0.378969	0.339495	0.262161	0.364289	0.403239	0.446927
kud	0.600858	0.497452	0.4767	0.474203	0.477754	-	0.463227	0.449458	0.519502	0.430222	0.485133	0.489075	0.425936	0.444125	0.486577	0.495928	0.441236	-	0.593677	0.650696
Ama	0.47881	-	-	1.01857	0.718803	0.946619	0.581725	-	0.886677	0.398615	0.545287	0.640814	-0.517022	0.505369	-	0.539635	0.38839	-	1.27868	0.5506
Oscillin	0.618965	0.531585	0.473543	0.616638	0.352522	0.475279	0.499356	0.470404	0.471571	0.517644	0.534286	0.64426	0.411507	0.510741	0.385106	-	0.341307	0.400437	0.444555	0.43326
CG33978	0.380899	0.331342	0.333462	0.384981	0.403804	0.541692	0.408544	0.482656	0.688946	0.491963	0.502995	0.640751	0.49299	0.35347	0.436781	0.552739	0.528119	0.399408	0.409209	0.439521
Sod3	-	-	-	0.416329	0.367563	0.51163	0.353495	0.726228	0.734223	0.479981	0.403927	0.776091	0.491533	0.342269	0.473291	0.945143	0.751968	0.479402	0.552967	0.414395
CG4586	0.468814	0.319988	0.465554	0.46867	0.425536	0.547406	0.454329	0.591311	0.515139	0.482853	0.360676	0.479821	0.531241	0.466468	0.430644	0.602547	0.276933	0.472755	0.46602	0.491072
neo	0.489815	0.348887	0.546924	0.543674	0.466474	0.591476	0.522091	0.552837	0.499949	0.615073	0.278725	0.400677	0.489388	0.559946	0.400537	0.814188	0.506697	0.393538	0.574371	-
CG31121	0.546123	0.334859	0.341614	0.435327	0.385692	0.602861	0.448832	0.594169	0.445413	0.454201	0.574614	0.728635	0.559506	0.502914	0.450776	0.535134	0.348066	0.43742	0.501067	0.389674
betaTub60D	-	0.628081	0.780005	0.519257	0.637604	0.706605	0.628479	0.508003	0.433722	0.400553	-	0.320368	-	0.601072	0.652594	0.866517	0.718594	0.342604	0.519122	0.364362
lncRNA:CR43432	0.248573	-	-	0.189441	0.366848	0.430109	0.282265	0.449249	0.495841	0.63466	0.523017	0.498603	0.56911	0.497994	0.685935	0.851703	0.97012	0.499983	0.929886	0.724126
CG11686	0.631448	0.41831	0.55364	0.464189	0.38617	0.479393	0.475447	0.416597	0.507423	-	0.336127	0.728102	0.487112	0.503954	0.51903	0.690556	0.732612	0.526162	0.499244	0.566241
Spn100A	0.565691	0.850348	1.0863	0.994673	0.882921	1.11459	1.03013	-	1.01884	-	-	-	-	0.646018	0.640835	0.704621	0.559392	-	-	-
Diap1	0.595214	0.421786	0.45951	0.611197	0.493067	0.619931	0.510419	0.475364	0.467269	0.553016	0.405365	0.716673	0.5108	0.427165	0.457373	0.372401	0.418548	0.490034	0.647793	0.467801
Eip78C	0.602203	0.407883	0.483022	0.466285	0.420294	0.505717	0.449931	0.574878	0.47973	0.508732	0.428993	0.713581	0.426911	0.697758	0.445923	0.615856	0.468579	0.506165	0.525722	0.400367
CG3823	0.524869	0.313075	0.493037	0.569998	0.368611	0.458332	0.404853	0.485154	0.603791	0.519786	0.612488	0.761483	0.567336	0.414832	0.498591	0.551326	0.449866	0.635026	0.715102	0.473662
CG4374	0.686115	-	-	0.499005	0.43518	0.618397	0.608052	0.535286	0.458584	0.415865	0.727351	1.51143	0.785605	0.743588	0.59826	0.840446	0.668459	-	-	0.289635
CG41128	0.70279	0.658661	0.618397	0.698252	-	0.629409	0.610578	0.652429	-	0.566725	0.642708	0.47807	0.538687	0.570485	0.627775	0.507219	-	0.619121	0.633353	0.684286
kek1	1.08819	0.609976	0.740351	0.482309	0.522044	0.498223	0.277526	0.485822	-	0.583775	0.479429	0.896685	0.626024	0.549614	0.509914	0.774298	0.575241	0.414708	-	0.41024
nmo	0.623465	0.297504	0.381786	0.596013	0.474131	0.64567	0.388408	0.385596	0.577261	0.556952	0.487542	0.717452	0.507614	0.37395	0.547094	0.575819	0.379791	0.71342	0.743102	0.716078
stai	-	0.601948	0.590221	0.576049	0.58149	0.849811	0.644661	0.733066	0.674853	0.687601	0.5881	0.957649	0.63087	-	0.59551	0.726758	0.498559	0.502183	0.369649	-
St2	1.21652	0.753351	0.548189	0.546559	0.474909	0.516745	0.703063	0.499758	0.433999	-	0.182541	0.650216	0.420982	0.458874	0.851458	1.00419	0.749097	0.725402	0.441894	-
Pdi	0.500475	0.555359	0.630001	0.632457	0.549276	0.634408	0.571058	0.649412	0.555497	0.458481	0.504274	0.43565	0.54957	0.672078	0.608766	0.817681	0.618063	0.49067	0.582156	0.540255
CG7675	0.918948	0.724344	0.83967	0.780935	0.847219	0.894875	0.819042	0.600095	0.999995	0.65619	-	0.628736	0.462247	0.572972	0.733329	0.655084	0.436628	0.539095	-	-0.216428
bip1	0.563087	0.405317	0.537828	0.629721	0.583647	0.83021	0.618497	0.621234	0.75433	0.750579	0.746182	0.969556	0.696696	0.551629	0.472677	0.453886	0.316539	0.577584	0.526223	0.429656
GV1	0.869029	0.428434	0.580325	0.465287	0.498042	0.56689	0.432667	0.863101	0.514211	0.923452	1.18112	0.791422	1.02417	0.685162	0.494146	-	-	0.637866	0.483884	0.746379
CG31997	0.597948	0.435676	0.423225	0.564336	0.537917	0.673507	0.5739	0.837114	0.703381	0.352298	0.368701	0.853979	0.621609	0.789143	0.673037	0.932751	0.704007	0.596704	0.752097	1.18909
CG15905	0.284195	0.7833	0.941488	0.809997	0.749278	1.15086	0.681719	1.11168	1.45423	1.20184	-	0.433954	0.53119	0.454297	0.535058	1.3489	0.936374	0.603511	-	-
CG2852	0.533264	0.509957	0.683325	0.676293	0.690113	0.887175	0.749805	0.90134	0.818825	0.870808	0.666995	0.786056	0.695941	0.540583	0.812308	0.869782	0.705853	0.673896	0.82013	0.652306
Hsp27	-	0.684531	0.65768	-	0.782584	0.740639	0.884812	0.952597	0.932568	0.86835	0.864355	1.05731	0.883558	0.701013	0.880855	0.967158	0.859346	0.722271	0.773931	0.705492
ogre	0.74991	0.833462	0.869902	0.739365	0.519086	0.633325	0.697418	0.90088	0.930924	0.854606	0.826287	0.839824	0.952096	0.724475	0.882307	0.846819	0.645847	0.778212	0.824151	0.810313
Cat	0.937253	0.697156	0.874864	0.893808	0.770242	0.934976	0.919547	0.90834	0.925091	0.749145	0.632776	0.817326	0.843458	0.74844	0.738502	1.29519	0.995857	0.691917	1.09552	0.659308
pio	0.926434	0.58605	0.789385	0.82066	0.728922	0.86568	0.850352	1.02847	1.23883	0.923937	1.09311	1.27989	1.26089	0.959618	0.969515	0.990869	0.776713	0.998038	0.752573	0.57029
Argk	-	0.644987	0.714562	0.901146	0.963199	0.93498	1.36281	1.54348	0.905732	0.996199	0.845232	0.754012	0.910952	0.945763	0.675437	1.09657	0.903574	0.779348	1.2505	1.61772
CG9628	0.739429	0.769402	0.911996	0.864514	0.951734	0.928585	0.883031	1.22736	1.01751	1.00762	1.16905	0.982639	1.31925	1.14446	1.26316	0.873434	0.774915	1.18641	0.793591	0.673572
wbl	0.785033	0.763129	0.994314	1.07488	0.785308	1.1377	0.974864	1.03911	1.12078	1.01133	0.824383	1.07612	0.917729	1.09821	0.927406	1.29135	0.922667	0.959451	1.33293	1.02323
ImpE1	-	0.460586	0.798963	0.621167	0.783642	1.01462	0.400939	1.51925	1.15612	1.53731	0.868912	1.21721	0.973015	1.15755	1.22615	1.50681	0.87906	1.22121	1.68471	1.05185
CG6287	0.741253	0.858695	0.85021	0.879346	0.840605	0.981539	0.915386	1.19303	1.25547	1.05512	0.917471	1.11999	0.980496	1.04678	1.06748	1.18454	0.910535	1.13216	1.28722	1.2457
Hr4	1.10183	0.768218	0.89062	0.921615	1.07669	1.23464	0.885081	1.20708	1.19915	1.23224	1.27278	1.21864	1.29723	1.03828	1.08832	1.09503	0.677846	1.13494	0.868152	0.890673
CG11899	0.760852	1.02098	1.04983	1.03003	1.02506	1.23072	1.137	1.25389	1.20242	1.10505	1.05194	1.12285	1.04627	1.15904	1.13379	0.976469	0.749719	1.11435	1.1685	1.13997
Spn43Aa	1.7982	0.642869	0.886827	0.780238	0.687036	0.817437	0.614843	1.92856	1.10777	2.09637	0.688476	2.80415	1.31631	1.10162	1.27021	1.26993	1.04077	1.09539	0.827381	-
ImpE3	0.810111	0.76309	0.85777	0.80914	0.930491	1.21628	0.828934	1.01434	1.28821	1.16625	1.38322	1.55719	1.14031	1.33564	1.36401	1.57619	1.29957	1.3434	1.48131	0.809907
lncRNA:CR34335	1.28762	1.09902	1.0934	1.14492	1.15994	1.23988	1.19048	1.2891	1.2575	1.24816	1.19122	1.31297	1.1661	1.0446	1.22702	1.20576	1.2165	1.19743	1.0573	1.09943
ImpE2	3.15003	3.16039	3.14704	3.26756	3.41131	3.85877	3.6431	3.59153	3.66882	3.70271	3.03704	3.4844	3.27207	3.05808	2.81992	3.5128	3.2428	3.32675	3.88347	2.44008
