# Supplementary material for: Single-cell transcriptomics of the Drosophila wing disc reveals instructive epithelium-to-myoblast interactions
Source: eLife. 2021 Mar 22;10:e61276. doi: 10.7554/eLife.61276 (PMC8021398; doi:10.7554/eLife.61276)
Supplement: Supplementary file 3. — Genes were selected based on being significantly and consistently upregulated or downregulated between the two time points in either the direct and/or the indirect AMPs. The average gene expression within cells (natural-log scale), fraction of cells expressing a given gene, fold-change between time points (natural-log scale), and false discovery rate (FDR) for differential expression significance are reported. These gene expression, detection, and fold-change calculations are averaged across each of the pairwise comparisons performed, and the max FDR value is shown (see Materials and methods for details on differential expression between time points). Negative fold-change values indicate higher expression at 96 hr and are colored magenta. Positive fold-change values indicate higher expression at 120 hr and are colored green. N.R.: not replicable; calculations in which the fold-change direction differed between pairwise comparisons. [file elife-61276-supp3.xlsx]

## Sheet: Supplementary file 3
	Direct 96h	Direct 120h	Indirect 96h	Indirect 120h	Direct 96h	Direct 120h	Indirect 96h	Indirect 120h	Direct 96h-120h	Direct 96h-120h	Indirect 96h-120h	Indirect 96h-120h
	log avg exp	log avg exp	log avg exp	log avg exp	avg fraction exp	avg fraction exp	avg fraction exp	avg fraction exp	log avg FC	max FDR	log avg FC	max FDR
Aldh	1.217	0.032	1.411	0.137	0.915	0.041	0.956	0.154	-1.053	0	-1.233	0
Thor	1.353	0.153	1.149	0.193	0.908	0.172	0.856	0.193	-1.149	0	-0.951	0
CG10527	1.536	0.459	1.618	0.518	0.985	0.467	0.986	0.525	-1.047	0	-1.094	0
Chd64	1.429	0.343	1.602	0.54	0.965	0.4	0.981	0.576	-1.001	0	-1.042	0
CG44325	1.383	0.504	1.484	0.509	0.964	0.469	0.978	0.487	-0.805	0	-0.956	0
CG15093	1.363	0.422	1.226	0.487	0.993	0.422	0.978	0.517	-0.93	0	-0.747	0
chinmo	1.518	0.732	1.59	0.708	0.999	0.668	0.999	0.672	-0.797	0	-0.894	0
GstD1	3.035	2.203	2.867	2.013	1	0.994	1	0.967	-0.829	0	-0.853	0
ab	1.128	0.362	1.03	0.221	0.98	0.396	0.954	0.258	-0.777	0	-0.824	0
CG1572	1.179	0.356	1.394	0.635	0.962	0.342	0.959	0.551	-0.813	0	-0.759	0
SPARC	3.331	2.569	3.395	2.717	1	0.999	1	1	-0.775	0	-0.698	0
GstD3	1.179	0.445	0.922	0.301	0.93	0.47	0.856	0.341	-0.736	0	-0.625	0
fru	1.135	0.413	1.137	0.435	0.993	0.46	0.985	0.486	-0.724	0	-0.709	0
LamC	0.724	0.095	0.89	0.177	0.847	0.106	0.89	0.198	-0.605	0	-0.711	0
Msp300	1.633	0.951	1.634	1.034	1	0.799	0.998	0.863	-0.688	0	-0.601	0
mamo	1.109	0.462	1.161	0.484	0.974	0.53	0.977	0.573	-0.632	0	-0.68	0
ps	1.116	0.588	1.078	0.498	0.993	0.598	0.982	0.575	-0.534	0	-0.591	0
mbl	0.785	0.415	0.887	0.349	0.931	0.516	0.946	0.462	-0.367	0	-0.535	0
sty	1.291	0.884	0.888	0.369	0.978	0.784	0.868	0.446	-0.412	0	-0.528	0
stg	1.661	1.443	1.735	1.221	0.992	0.873	0.98	0.792	N.R.	N.R.	-0.527	0
Clic	1.244	0.833	1.5	0.94	0.993	0.867	0.995	0.9	N.R.	N.R.	-0.522	0
hdc	1.987	1.557	1.877	1.368	0.999	0.983	0.999	0.975	-0.422	0	-0.487	0
zld	1.114	0.705	1.178	0.712	0.993	0.766	0.989	0.799	-0.412	0	-0.471	0
CG17032	0.74	0.283	0.645	0.41	0.711	0.289	0.641	0.418	-0.456	0	-0.236	0
Tina-1	1.341	0.88	1.396	0.947	0.997	0.84	0.998	0.896	-0.456	0	-0.452	0
CG9593	0.959	0.503	1.056	1.115	0.942	0.504	0.941	0.887	-0.439	0	N.R.	N.R.
Atf3	0.503	0.166	0.693	0.262	0.789	0.229	0.866	0.348	-0.339	0	-0.435	0
Ten-a	1.441	1.72	1.276	0.848	0.999	0.988	0.988	0.698	0.29	0.054	-0.426	0
CG5151	0.644	0.368	0.65	0.209	0.845	0.463	0.814	0.303	-0.26	0	-0.416	0
CG10939	0.357	0.151	0.534	0.122	0.546	0.195	0.661	0.17	-0.209	0	-0.41	0
SP1173	0.611	0.201	0.594	0.2	0.873	0.278	0.852	0.289	-0.408	0	-0.397	0
hoip	2.066	1.7	2.056	1.954	1	0.984	0.998	0.991	-0.382	0	N.R.	N.R.
CG32425	0.84	0.458	0.924	0.559	0.945	0.578	0.949	0.693	-0.38	0	-0.364	0
CG15083	0.999	0.612	1.18	0.813	0.936	0.603	0.956	0.76	-0.377	0	-0.372	0
jim	1.907	1.788	1.818	1.448	1	0.998	1	0.981	-0.119	0	-0.377	0
Col4a1	1.353	1.243	1.018	0.636	0.989	0.876	0.96	0.622	-0.104	0.001	-0.376	0
pyd	1.038	0.919	0.689	0.313	0.963	0.804	0.829	0.4	N.R.	N.R.	-0.373	0
CG9338	0.249	0.03	0.444	0.077	0.424	0.041	0.567	0.099	-0.219	0	-0.369	0
CG11267	2.251	1.89	2.272	2.155	1	0.999	1	0.999	-0.357	0	-0.12	0
CG46339	0.718	0.349	0.576	0.359	0.89	0.401	0.819	0.453	-0.351	0	-0.216	0
GILT3	0.459	0.08	0.427	0.161	0.585	0.096	0.543	0.205	-0.351	0	-0.269	0
Nrg	0.734	0.498	0.827	0.483	0.92	0.602	0.927	0.633	-0.219	0.001	-0.342	0
CG13631	0.385	0.049	0.217	0.032	0.548	0.069	0.365	0.049	-0.336	0	-0.185	0
Oatp74D	1.033	0.687	1.107	0.984	0.967	0.711	0.969	0.885	-0.333	0	N.R.	N.R.
Imp	1.346	1.129	1.198	0.867	0.997	0.925	0.989	0.864	-0.218	0	-0.331	0
rgn	1.193	0.855	0.981	0.753	0.987	0.766	0.952	0.754	-0.331	0	-0.231	0
CG2865	0.748	0.448	0.702	0.378	0.905	0.561	0.855	0.496	-0.302	0	-0.326	0
wdp	0.406	0.264	0.726	0.395	0.712	0.384	0.882	0.526	-0.142	0	-0.326	0
Mpcp2	1.414	1.101	1.422	1.188	0.999	0.948	0.998	0.972	-0.313	0	-0.228	0
REG	1.618	1.313	1.633	1.427	1	0.974	0.999	0.981	-0.307	0	-0.213	0
dally	0.44	0.245	0.672	0.366	0.73	0.32	0.847	0.472	-0.195	0	-0.306	0
Adk2	1.477	1.176	1.499	1.274	1	0.948	1	0.976	-0.303	0	-0.232	0
Pdp1	0.462	0.16	0.506	0.281	0.759	0.22	0.748	0.396	-0.303	0	-0.228	0
Trx-2	1.661	1.402	1.688	1.393	0.999	0.979	0.999	0.98	-0.26	0	-0.302	0
CG8547	0.632	0.405	0.642	0.337	0.861	0.516	0.856	0.472	-0.213	0	-0.302	0
Cyt-c-p	1.475	1.176	1.459	1.361	0.997	0.914	0.991	0.951	-0.301	0	-0.11	0.003
Tsp42El	0.213	0.049	0.437	0.136	0.422	0.077	0.647	0.206	-0.16	0	-0.3	0
CG42342	0.265	0.302	0.619	0.326	0.422	0.323	0.65	0.33	N.R.	N.R.	-0.298	0
baf	1.624	1.344	1.648	1.366	1	0.968	0.999	0.979	-0.286	0	-0.292	0
Mgstl	0.947	0.696	0.945	0.665	0.968	0.748	0.956	0.753	-0.256	0	-0.282	0
Moe	1.84	1.614	1.805	1.527	1	0.992	1	0.988	-0.225	0	-0.278	0
CG12643	0.36	0.097	0.441	0.164	0.558	0.124	0.578	0.164	-0.255	0	-0.276	0
stv	0.401	0.205	0.44	0.151	0.504	0.161	0.514	0.154	N.R.	N.R.	-0.273	0
trol	0.99	0.72	1.025	0.838	0.973	0.776	0.97	0.872	-0.27	0	-0.177	0
Pax	0.804	0.614	0.697	0.448	0.942	0.711	0.89	0.589	-0.192	0	-0.252	0
Nop60B	1.852	1.603	1.891	1.834	1	0.988	1	0.996	-0.249	0	-0.053	0.161
vkg	0.736	0.593	0.511	0.269	0.909	0.623	0.776	0.359	-0.142	0	-0.246	0
CG3902	0.334	0.095	0.363	0.127	0.588	0.138	0.598	0.191	-0.237	0	-0.24	0
Cbs	0.633	0.4	0.618	0.391	0.885	0.515	0.861	0.524	-0.236	0	-0.233	0
nop5	1.66	1.43	1.693	1.691	1	0.98	0.999	0.992	-0.227	0	N.R.	N.R.
CG1354	1.311	1.084	1.302	1.114	0.999	0.947	0.997	0.963	-0.226	0	-0.187	0
kek1	0.82	0.795	0.692	0.473	0.909	0.749	0.834	0.508	N.R.	N.R.	-0.225	0
CG5903	1.251	1.03	1.234	1.074	0.998	0.937	0.993	0.951	-0.224	0	-0.165	0
cher	0.255	0.028	0.282	0.067	0.497	0.046	0.527	0.11	-0.221	0	-0.219	0
Tspo	1.008	0.794	1.05	0.841	0.974	0.817	0.965	0.857	-0.218	0	-0.214	0
Jheh2	0.303	0.12	0.404	0.193	0.56	0.177	0.645	0.276	-0.186	0	-0.215	0
REPTOR	0.28	0.084	0.287	0.075	0.542	0.128	0.531	0.12	-0.196	0	-0.213	0
dpr16	0.465	0.256	0.157	0.109	0.722	0.303	0.268	0.139	-0.209	0	-0.046	0
LanB1	0.841	0.64	0.719	0.514	0.95	0.746	0.903	0.671	-0.199	0	-0.203	0
CG34325	0.196	0.012	0.221	0.032	0.392	0.019	0.399	0.049	-0.182	0	-0.19	0
LanA	0.614	0.43	0.579	0.398	0.875	0.548	0.834	0.56	-0.184	0	-0.179	0
CG15387	0.487	0.673	0.477	0.589	0.814	0.788	0.79	0.764	0.188	0	0.114	0
jtb	0.315	0.428	0.406	0.604	0.555	0.515	0.631	0.68	0.115	0.04	0.203	0
Bacc	2.887	3.098	2.987	3.036	1	1	1	1	0.213	0	N.R.	N.R.
Catsup	0.569	0.78	0.592	0.737	0.853	0.845	0.863	0.847	0.214	0	0.147	0
lncRNA:CR31044	0.466	0.679	0.532	0.713	0.753	0.751	0.793	0.8	0.214	0	0.177	0
pum	1.116	1.343	1.12	1.285	0.992	0.986	0.989	0.987	0.228	0	0.173	0
CG33993	0.132	0.359	0.02	0.05	0.236	0.389	0.032	0.047	0.228	0.001	0.031	0.704
Ald1	0.36	0.597	0.617	0.725	0.541	0.553	0.707	0.703	0.238	0.03	0.119	0.649
CG15168	0.501	0.723	0.447	0.69	0.789	0.822	0.733	0.799	0.232	0	0.241	0
pcs	0.244	0.48	0.257	0.465	0.48	0.633	0.506	0.643	0.244	0	0.205	0
robo2	0.135	0.149	0.275	0.517	0.308	0.22	0.523	0.629	0.014	0.603	0.25	0
Oscillin	0.186	0.437	0.189	0.43	0.414	0.574	0.395	0.607	0.252	0	0.245	0
CG33774	0.523	0.752	0.459	0.72	0.826	0.817	0.761	0.835	0.233	0	0.255	0
miple2	1.851	2.105	1.927	2.139	1	1	1	1	0.256	0	0.213	0
Gbeta13F	1.678	1.93	1.636	1.76	1	1	1	0.999	0.256	0	0.129	0
RpL38	4.1	4.341	4.102	4.368	1	1	1	1	0.24	0	0.259	0
fng	0.367	0.279	0.854	1.107	0.59	0.331	0.904	0.902	-0.089	0	0.265	0
Cat	0.576	0.839	0.606	0.831	0.862	0.865	0.857	0.882	0.271	0	0.236	0
Pgk	1.038	1.308	1.197	1.321	0.974	0.978	0.989	0.98	0.276	0	0.125	0
mnd	0.446	0.592	0.433	0.711	0.72	0.69	0.702	0.791	0.154	0.311	0.283	0
Mtpbeta	1.182	1.461	1.089	1.266	0.99	0.988	0.99	0.98	0.286	0	0.181	0
CBP	0.801	1.082	0.758	1.023	0.931	0.944	0.892	0.922	0.287	0	0.279	0
side	0.017	0.15	0.024	0.301	0.042	0.168	0.042	0.33	0.137	0.072	0.291	0
HSPC300	0.477	0.741	0.415	0.707	0.795	0.83	0.721	0.827	0.275	0	0.293	0
Inx3	0.467	0.758	0.659	0.891	0.717	0.8	0.819	0.878	0.295	0	0.248	0
CG6891	2.263	2.56	2.424	2.612	1	1	1	1	0.3	0	0.196	0
CG8031	0.344	0.631	0.331	0.627	0.667	0.743	0.621	0.773	0.291	0	0.301	0
CG42239	0.976	1.264	0.911	1.212	0.981	0.965	0.968	0.974	0.301	0	0.304	0
l(2)k09913	1.304	1.612	1.203	1.374	0.997	0.996	0.987	0.984	0.313	0	0.179	0
MESR3	0.059	0.367	0.023	0.222	0.138	0.434	0.055	0.329	0.316	0	0.211	0
CG7841	0.2	0.511	0.134	0.404	0.382	0.493	0.3	0.431	0.318	0	0.289	0
mdy	0.096	0.31	0.117	0.42	0.233	0.421	0.263	0.577	0.223	0	0.318	0
Kal1	0.582	0.688	0.67	0.965	0.768	0.709	0.739	0.812	N.R.	N.R.	0.319	0
NK7.1	0.255	0.571	0.116	0.145	0.448	0.564	0.221	0.172	0.324	0	N.R.	N.R.
Maf1	0.614	0.931	0.649	0.889	0.89	0.908	0.889	0.912	0.328	0	0.255	0
ImpE2	0.011	0.345	0.013	0.344	0.035	0.453	0.033	0.48	0.329	0	0.324	0
bip1	0.119	0.442	0.116	0.348	0.263	0.511	0.247	0.457	0.331	0	0.242	0
fok	0.126	0.45	0.123	0.211	0.257	0.504	0.22	0.257	0.332	0	N.R.	N.R.
CG4455	0.501	0.827	0.442	0.685	0.823	0.864	0.753	0.813	0.335	0	0.255	0
mRpL33	0.71	0.971	0.663	1.001	0.908	0.921	0.891	0.936	0.273	0	0.335	0
Pvf3	0.204	0.434	0.088	0.41	0.293	0.386	0.144	0.361	0.24	0.856	0.342	0
M6	0.11	0.445	0.108	0.192	0.275	0.522	0.25	0.301	0.343	0	0.089	0.064
CG11486	0.497	0.832	0.514	0.704	0.793	0.842	0.799	0.818	0.344	0	0.197	0
fbp	0.833	1.171	0.853	1.171	0.951	0.939	0.927	0.947	0.345	0	0.329	0
Plp	0.235	0.578	0.177	0.33	0.488	0.664	0.369	0.474	0.349	0	0.161	0
sqh	1.678	2.028	1.507	1.741	1	1	0.999	0.998	0.362	0	0.25	0
CG6959	0.116	0.471	0.162	0.28	0.266	0.532	0.345	0.394	0.366	0	0.128	0.463
noc	0.435	0.399	0.684	1.026	0.673	0.434	0.828	0.863	N.R.	N.R.	0.367	0
kud	0.926	1.199	0.845	1.208	0.976	0.96	0.955	0.969	0.294	0	0.369	0
Con	0.006	0.364	0.024	0.207	0.013	0.296	0.047	0.205	0.37	0	0.198	0
Gapdh2	1.165	1.539	1.562	1.586	0.982	0.97	0.995	0.979	0.374	0	N.R.	N.R.
Mkp3	0.898	1.272	0.767	0.914	0.954	0.954	0.903	0.881	0.376	0	0.15	0
UQCR-11	1.91	2.222	1.886	2.253	1	1	1	1	0.344	0	0.377	0
kirre	0.244	0.612	0.122	0.139	0.451	0.655	0.247	0.215	0.377	0	N.R.	N.R.
fj	0.211	0.586	0.175	0.198	0.422	0.619	0.346	0.264	0.378	0	0.024	0.84
Mtpalpha	0.922	1.298	0.84	1.105	0.981	0.975	0.945	0.958	0.385	0	0.274	0
CG15529	0.304	0.135	0.412	0.784	0.47	0.154	0.529	0.698	-0.171	0	0.385	0
Pdi	1.525	1.901	1.447	1.724	1	0.999	0.999	0.998	0.386	0	0.286	0
cv-c	0.789	1.084	0.678	1.063	0.922	0.889	0.846	0.903	0.292	0.017	0.39	0
cdi	0.344	0.727	0.387	0.644	0.637	0.777	0.664	0.74	0.392	0	0.255	0
Eno	1.619	2.009	1.704	1.888	1	0.998	0.999	0.999	0.399	0	0.193	0
CG2852	2.824	3.219	2.887	3.131	1	1	1	1	0.4	0	0.245	0
Ama	2.436	2.825	1.241	1.416	0.996	0.994	0.779	0.656	0.405	0	0.203	0.704
Fim	0.603	0.994	0.722	1.091	0.852	0.904	0.875	0.942	0.407	0	0.398	0
mt:ND3	0.593	0.98	0.64	0.983	0.815	0.899	0.812	0.925	0.408	0	0.389	0
luna	0.862	1.266	0.795	1.025	0.962	0.965	0.928	0.925	0.408	0	0.229	0
Dtg	0.067	0.466	0.037	0.171	0.156	0.5	0.084	0.246	0.41	0	0.144	0
Tpi	0.755	1.166	1.037	1.297	0.909	0.934	0.952	0.968	0.414	0	0.271	0
CG13364	1.672	1.896	1.572	1.963	1	0.998	0.997	0.998	N.R.	N.R.	0.415	0
beat-IIIc	0.886	1.297	0.755	0.904	0.902	0.944	0.761	0.751	0.427	0	0.174	0.001
Ten-m	0.281	0.7	0.225	0.275	0.539	0.728	0.445	0.337	0.428	0	0.056	0.39
Sdc	0.834	1.254	0.879	1.107	0.964	0.965	0.957	0.955	0.431	0	0.249	0
tok	0.156	0.576	0.035	0.046	0.255	0.46	0.072	0.057	0.435	0	N.R.	N.R.
sbb	1.286	1.72	1.173	1.468	1	0.998	0.991	0.989	0.437	0	0.297	0
beat-IIb	0.003	0.072	0.037	0.455	0.008	0.085	0.059	0.404	0.073	0.041	0.439	0
Ppn	0.352	0.522	0.433	0.845	0.63	0.601	0.685	0.831	0.179	0.966	0.44	0
CG15628	0.158	0.59	0.079	0.294	0.199	0.508	0.103	0.264	0.446	0	0.232	0
pdgy	0.293	0.736	0.246	0.576	0.549	0.796	0.453	0.701	0.45	0	0.345	0
Acbp1	1.06	1.491	0.877	1.323	0.989	0.987	0.952	0.978	0.438	0	0.451	0
Eip78C	0.049	0.494	0.039	0.416	0.117	0.583	0.088	0.541	0.451	0	0.389	0
fz	0.693	1.14	0.76	0.982	0.909	0.929	0.915	0.921	0.456	0	0.234	0
CG4586	0.06	0.491	0.038	0.469	0.136	0.552	0.08	0.552	0.445	0	0.456	0
stai	1.367	1.82	1.387	1.654	0.973	0.99	0.968	0.982	0.461	0	0.277	0
caup	0.382	0.846	0.114	0.159	0.599	0.723	0.221	0.188	0.472	0	N.R.	N.R.
Jupiter	1.603	2.074	1.494	1.818	0.998	0.998	0.998	0.998	0.483	0	0.338	0
dnt	0.213	0.694	0.19	0.568	0.451	0.755	0.387	0.684	0.49	0	0.397	0
mid	0.248	0.726	0.052	0.092	0.331	0.534	0.078	0.078	0.502	0.026	N.R.	N.R.
smal	0.407	0.901	0.115	0.417	0.649	0.764	0.215	0.447	0.51	0	0.326	0
CG3655	0.56	1.056	0.605	1.046	0.819	0.897	0.837	0.923	0.511	0	0.468	0
Syp	2.019	2.515	2.102	2.558	1	1	1	1	0.512	0	0.49	0
hth	2.142	2.628	2.138	2.478	1	0.999	1	1	0.514	0	0.387	0.026
CG7637	1.018	1.289	0.97	1.485	0.974	0.96	0.959	0.985	0.287	0.112	0.516	0
msi	1.264	1.753	1.167	1.453	0.995	0.997	0.984	0.989	0.519	0	0.309	0
Gapdh1	1.044	1.558	1.281	1.613	0.965	0.974	0.975	0.983	0.52	0	0.339	0
ara	0.122	0.63	0.026	0.062	0.256	0.569	0.061	0.084	0.521	0	0.04	0.388
fax	2.706	3.232	2.654	3.082	1	1	1	1	0.526	0	0.427	0
Tom7	1.526	1.793	1.421	1.937	0.998	0.998	0.996	0.998	N.R.	N.R.	0.531	0
Eip75B	0.324	0.848	0.318	0.8	0.558	0.802	0.536	0.804	0.538	0	0.513	0
CG12880	0.216	0.747	0.15	0.495	0.442	0.711	0.315	0.599	0.549	0	0.368	0
CG6770	1.552	2.097	1.647	1.883	0.992	0.997	0.989	0.99	0.563	0	0.26	0
rst	0.183	0.74	0.248	0.569	0.367	0.745	0.434	0.665	0.568	0	0.343	0
vg	0.542	0.63	0.821	1.319	0.669	0.51	0.807	0.939	N.R.	N.R.	0.568	0
cib	2.607	3.159	2.508	3.03	1	1	1	1	0.569	0	0.549	0
l(3)neo38	0.555	1.1	0.551	1.088	0.796	0.935	0.761	0.944	0.561	0	0.571	0
br	0.946	1.505	0.981	1.49	0.962	0.984	0.956	0.987	0.584	0	0.551	0
Btk29A	0.887	1.445	0.989	1.53	0.957	0.958	0.958	0.978	0.586	0	0.577	0
Act5C	4.073	4.649	4.01	4.457	1	1	1	1	0.597	0	0.466	0
bib	0.311	0.933	0.343	0.831	0.583	0.821	0.622	0.828	0.644	0	0.52	0
Tet	0.953	1.592	1.018	0.997	0.954	0.966	0.966	0.907	0.658	0	N.R.	N.R.
nmo	0.573	1.227	0.539	1.061	0.871	0.928	0.82	0.912	0.671	0	0.545	0
lms	0.056	0.727	0.022	0.108	0.097	0.548	0.03	0.072	0.683	0	0.091	0
Gyg	0.262	0.94	0.168	0.354	0.414	0.847	0.287	0.45	0.696	0	0.199	0
CG41128	1.176	1.767	1.097	1.751	0.987	0.997	0.979	0.998	0.663	0	0.696	0
CG6287	0.217	0.881	0.219	0.929	0.451	0.806	0.43	0.835	0.68	0	0.74	0
Act87E	0.873	1.599	0.592	0.577	0.873	0.876	0.724	0.531	0.745	0	N.R.	N.R.
tna	0.894	1.668	1.131	1.78	0.913	0.981	0.959	0.995	0.8	0	0.705	0
Fas2	1.273	2.068	1.422	2.228	0.995	0.984	0.996	0.998	0.812	0	0.809	0
Mef2	0.277	1.08	0.24	0.678	0.54	0.804	0.467	0.696	0.834	0	0.478	0
wb	0.752	1.603	0.597	0.854	0.734	0.941	0.684	0.718	0.869	0	0.292	0.001
nemy	0.012	0.868	0.006	0.196	0.02	0.507	0.013	0.236	0.882	0	0.204	0
drl	0.408	1.309	0.297	0.625	0.649	0.895	0.518	0.599	0.926	0	0.356	0.001
lncRNA:CR34335	4.11	4.816	4.028	4.767	1	1	1	1	0.938	0	0.912	0
sn	0.797	1.755	0.751	1.447	0.931	0.987	0.901	0.955	0.992	0	0.755	0
mub	0.334	1.147	0.345	1.296	0.652	0.775	0.643	0.854	0.85	0.026	1.019	0
eEF1alpha2	0.038	1.079	0.062	0.918	0.083	0.558	0.109	0.602	1.073	0	0.9	0
Nrt	0.445	1.64	0.223	0.543	0.638	0.868	0.416	0.56	1.238	0	N.R.	N.R.
Him	0.367	1.568	0.597	1.626	0.524	0.856	0.606	0.904	1.243	0	1.094	0
CG11835	0.208	1.509	0.109	0.885	0.228	0.911	0.127	0.59	1.342	0	0.82	0
Act57B	0.066	1.535	0.091	0.646	0.099	0.687	0.1	0.359	1.512	0	0.601	0
Argk	0.142	2.631	0.091	0.944	0.295	0.77	0.21	0.419	2.541	0	0.914	0
